# Supplementary material for: Genome sequence reveals that Pseudomonas fluorescens F113 possesses a large and diverse array of systems for rhizosphere function and host interaction
Source: PubMed Central journal article supplement (PMC3570484; doi:10.1186/1471-2164-14-54), 2013-01-25
Supplement: 1471-2164-14-54-S1.pdf [file 1471-2164-14-54-S1.pdf]

| Strain                                                    | Type         | INSDC          | Size (Mb) | GC%  | CDS   | rRNA | tRNA | Other RNA | Reference   |
|-----------------------------------------------------------|--------------|----------------|-----------|------|-------|------|------|-----------|-------------|
| <i>P. brassicacearum</i> NFM421                           | Complete     | CP002585.1     | 6.84      | 60.8 | 6095  | 16   | 65   | -         | [1]         |
| <i>P. brassicacearum</i> Q8r1-96                          | Draft (5)    | CM001512.1     | 6.60      | 61.0 | 5715  | 16   | 65   | 20        | [2]         |
| <i>Pseudomonas chlororaphis subsp. aureofaciens</i> 30-84 | Draft(13)    | CM001559.1     | 6.66      | 62.9 | 5848  | 19   | 74   | 19        | [2]         |
| <i>P. chlororaphis</i> GP72                               | Draft (347)  | AHAY00000000.1 | 6.63      | 63.1 | 6107  | -    | 56   | -         | [3]         |
| <i>P. chlororaphis</i> O6                                 | Draft (31)   | CM001490.1     | 6.98      | 62.9 | 6,223 | -    | -    | -         | [2]         |
| <i>P. extremaustralis</i> 14-3 substr 14-3b               | Draft (113)  | AHIP00000000.1 | 6.59      | 60.7 | 5934  | 13   | 49   | -         | [4]         |
| <i>P. fluorescens</i> A506                                | Complete     | CP003041.1     | 5.96      | 60.0 | 5627  | 19   | 69   | 17        | unpublished |
| <i>P. fluorescens</i> F113                                | Complete     | CP003150.1     | 6.85      | 60.8 | 5862  | 16   | 66   | 9         | [5]         |
| <i>P. fluorescens</i> NCIMB 11764                         | Draft(831)   | CM001560.1     | 6.69      | 58.6 | 6011  | 4    | 30   | -         | [6]         |
| <i>P. fluorescens</i> NZ007                               | Draft(809)   | AKBR00000000.1 | 6.47      | 60   | 5730  | 7    | 47   | -         | unpublished |
| <i>P. fluorescens</i> NZ011                               | Draft(973)   | AJXJ00000000.1 | 6.8       | 58.5 | 5923  | 6    | 53   | -         | unpublished |
| <i>P. fluorescens</i> NZ052                               | Draft(440)   | AJXH00000000.1 | 6.82      | 60.1 | 6078  | 5    | 52   | -         | unpublished |
| <i>P. fluorescens</i> NZ17                                | Draft(1032)  | AJXF00000000.1 | 6.8       | 63.2 | 6311  | 3    | 48   | -         | unpublished |
| <i>P. fluorescens</i> Pf0-1                               | Complete     | CP000094.2     | 6.85      | 60.5 | 5722  | 19   | 73   | 3         | [7]         |
| <i>P. fluorescens</i> Q2-87                               | Draft(2)     | AGBM00000000.1 | 6.36      | 60.6 | 5701  | 19   | 68   | -         | [2]         |
| <i>P. fluorescens</i> R124                                | Draft(77)    | ALYL01000000   | 6.25      | 60.3 | 5570  | -    | -    | -         | unpublished |
| <i>P. fluorescens</i> SBW25                               | Complete     | AM181176.4     | 6.72      | 60.5 | 5921  | 16   | 66   | 15        | [7]         |
| <i>P. fluorescens</i> SS101                               | Complete     | CM001513.1     | 6.18      | 60.0 | 5372  | 19   | 68   | 17        | unpublished |
| <i>P. fluorescens</i> Wayne1                              | Draft (90)   | CADX01000000   | 6.86      | -    | 6228  | -    | 52   | -         | [8]         |
| <i>P. fluorescens</i> WH6                                 | Draft(53)    | CM001025.1     | 6.27      | 60.5 | 5833  | 4    | 52   | -         | [9]         |
| <i>P. fluorescens</i> Wood1R                              | Draft (1437) | CAFF01000000   | 6.68      | -    | 5897  | -    | 30   | -         | [8]         |
| <i>P. mandelii</i> JR-1                                   | Draft (96)   | AJFM00000000.1 | 7.10      | 57.9 | 6374  | 5    | 54   | -         | [10]        |
| <i>P. protegens</i> Pf-5                                  | Complete     | CP000076.1     | 7.07      | 63.3 | 6108  | 16   | 71   | 17        | [11]        |
| <i>P. tolaasii</i> NCPPB 2192                             | Draft(13915) | AJXK00000000   | 14.37     | 60.2 | 12781 | 10   | 63   | -         | unpublished |
| <i>P. tolaasii</i> PMS117                                 | Draft(357)   | AJXG00000000   | 7.0       | 60.2 | 6178  | 3    | 52   | -         | unpublished |
| <i>Pseudomonas</i> sp Ag1                                 | Draft(113)   | AKVH00000000   | 7.25      | -    | 6482  | 4    | 48   | -         | [12]        |
| <i>P. synxantha</i> BG33R                                 | Complete     | CM001514.1     | 6.30      | 59.7 | 5509  | 19   | 68   | 18        | [2]         |
| <i>Pseudomonas</i> sp GM102                               | Draft(159)   | AKJB00000000   | 6.65      | -    | 6001  | 3    | 58   | 12        | [13]        |
| <i>Pseudomonas</i> sp GM16                                | Draft(128)   | AKJV00000000   | 6.55      | -    | 5867  | 2    | 64   | 13        | [13]        |
| <i>Pseudomonas</i> sp GM17                                | Draft(280)   | AKJU00000000   | 6.78      | -    | 6085  | 3    | 56   | 13        | [13]        |
| <i>Pseudomonas</i> sp GM18                                | Draft(140)   | AKJT00000000   | 6.29      | -    | 5682  | 2    | 61   | 12        | [13]        |
| <i>Pseudomonas</i> sp GM21                                | Draft(210)   | AKJS00000000   | 6.60      | -    | 6031  | 3    | 53   | 11        | [13]        |
| <i>Pseudomonas</i> sp GM24                                | Draft(399)   | AKJR00000000   | 6.51      | -    | 5828  | 7    | 54   | 12        | [13]        |

| Strain                           | Type        | INSDC           | Size (Mb) | GC%  | CDS  | rRNA | tRNA | Other RNA | Reference |
|----------------------------------|-------------|-----------------|-----------|------|------|------|------|-----------|-----------|
| <i>Pseudomonas sp</i> GM25       | Draft(91)   | AKJQ000000000   | 6.35      | -    | 5684 | 2    | 51   | 11        | [13]      |
| <i>Pseudomonas sp</i> GM30       | Draft(180)  | AKJP000000000   | 6.14      | -    | 5588 | 2    | 58   | 11        | [13]      |
| <i>Pseudomonas sp</i> GM33       | Draft(205)  | AKJO000000000   | 6.72      | -    | 6061 | 2    | 49   | 11        | [13]      |
| <i>Pseudomonas sp</i> GM41(2012) | Draft(164)  | AKJN000000000   | 6.61      | -    | 6012 | 3    | 57   | 12        | [13]      |
| <i>Pseudomonas sp</i> GM48       | Draft(200)  | AKJM000000000   | 6.44      | -    | 5845 | 3    | 47   | 11        | [13]      |
| <i>Pseudomonas sp</i> GM49       | Draft(345)  | AKJL000000000   | 6.58      | -    | 6227 | 3    | 57   | 13        | [13]      |
| <i>Pseudomonas sp</i> GM50       | Draft(155)  | AKJK000000000   | 6.69      | -    | 6033 | 3    | 57   | 11        | [13]      |
| <i>Pseudomonas sp</i> GM55       | Draft(163)  | AKJJ000000000   | 6.48      | -    | 5949 | 7    | 50   | 2         | [13]      |
| <i>Pseudomonas sp</i> GM60       | Draft(181)  | AKJI000000000   | 6.42      | -    | 5884 | 3    | 54   | 2         | [13]      |
| <i>Pseudomonas sp</i> GM67       | Draft(183)  | AKJH000000000   | 6.50      | -    | 5966 | 2    | 57   | 2         | [13]      |
| <i>Pseudomonas sp</i> GM74       | Draft(180)  | AKJG000000000   | 6.10      | -    | 5531 | 5    | 54   | 2         | [13]      |
| <i>Pseudomonas sp</i> GM78       | Draft(235)  | AKJF000000000   | 7.28      | -    | 6681 | 2    | 57   | 1         | [13]      |
| <i>Pseudomonas sp</i> GM79       | Draft(126)  | AKJE000000000   | 6.70      | -    | 6026 | 2    | 58   | 1         | [13]      |
| <i>Pseudomonas sp</i> GM80       | Draft(282)  | AKJD000000000   | 6.78      | -    | 6183 | 3    | 59   | 2         | [13]      |
| <i>Pseudomonas sp</i> PAMC 25886 | Draft (95)  | AHHC000000000.1 | 7.02      | 59.9 | 5830 | -    | 50   | -         | [14]      |
| <i>Pseudomonas sp</i> R62        | Draft (991) | AHZM000000000.1 | 6.32      | 59.5 | 5354 | -    | -    | -         | [15]      |
| <i>Pseudomonas sp</i> R81        | Draft (151) | AHZN01000000.1  | 6.22      | 61.7 | 5602 | -    | -    | -         | [15]      |

Numbers presented in parentheses indicate the number of contigs.

## REFERENCES

1. Ortet P, Barakat M, Lalaouna D, Fochesato S, Barbe V, Vacherie B, Santaella C, Heulin T, Achouak W: **Complete genome sequence of a beneficial plant root-associated bacterium, *Pseudomonas brassicacearum***. *J Bacteriol* 2011, **193**(12):3146.
2. Loper JE, Hassan KA, Mavrodi DV, Davis EW, 2nd, Lim CK, Shaffer BT, Elbourne LD, Stockwell VO, Hartney SL, Breakwell K *et al*: **Comparative genomics of plant-associated *Pseudomonas* spp.: insights into diversity and inheritance of traits involved in multitrophic interactions**. *PLoS Genetics* 2012, **8**(7):e1002784.
3. Shen X, Chen M, Hu H, Wang W, Peng H, Xu P, Zhang X: **Genome sequence of *Pseudomonas chlororaphis* GP72, a root-colonizing biocontrol strain**. *J Bacteriol* 2012, **194**(5):1269-1270.
4. Tribelli PM, Raiger lustman LJ, Catone MV, Di Martino C, Revale S, Mendez BS, Lopez NI: **Genome sequence of the polyhydroxybutyrate producer *Pseudomonas extremaustralis*, a highly stress-resistant Antarctic bacterium**. *J Bacteriol* 2012, **194**(9):2381-2382.
5. Redondo-Nieto M, Barret M, Morrissey JP, Germaine K, Martinez-Granero F, Barahona E, Navazo A, Sanchez-Contreras M, Moynihan JA, Giddens SR *et al*: **Genome sequence of the biocontrol strain *Pseudomonas fluorescens* F113**. *J Bacteriol* 2012, **194**(5):1273-1274.
6. Vilo CA, Benedik MJ, Kunz DA, Dong Q: **Draft Genome Sequence of the Cyanide-Utilizing Bacterium *Pseudomonas fluorescens* Strain NCIMB 11764**. *J Bacteriol* 2012, **194**(23):6618-6619.
7. Silby M, Cerdano-Tarraga A, Vernikos G, Giddens S, Jackson R, Preston G, Zhang X-X, Moon C, Gehrig S, Godfrey S *et al*: **Genomic and genetic analyses of diversity and plant interactions of *Pseudomonas fluorescens***. *Genome Biology* 2009, **10**(5):R51.
8. Rong X, Gurel FB, Meulia T, McSpadden Gardener BB: **Draft genome sequences of the *Pseudomonas fluorescens* biocontrol strains Wayne1R and Wood1R**. *J Bacteriol* 2012, **194**(3):724-725.
9. Kimbrel JA, Givan SA, Halgren AB, Creason AL, Mills DI, Banowetz GM, Armstrong DJ, Chang JH: **An improved, high-quality draft genome sequence of the Germination-Arrest Factor-producing *Pseudomonas fluorescens* WH6**. *BMC Genomics* 2010, **11**:522.
10. Jang SH, Kim J, Hong S, Lee C: **Genome sequence of cold-adapted *Pseudomonas mandelii* strain JR-1**. *J Bacteriol* 2012, **194**(12):3263.
11. Paulsen IT, Press CM, Ravel J, Kobayashi DY, Myers GS, Mavrodi DV, DeBoy RT, Seshadri R, Ren Q, Madupu R *et al*: **Complete genome sequence of the plant commensal *Pseudomonas fluorescens* Pf-5**. *Nat Biotechnol* 2005, **23**(7):873-878.
12. Wang Y, Gilbreath TM, 3rd, Kukutla P, Yan G, Xu J: **Dynamic gut microbiome across life history of the malaria mosquito *Anopheles gambiae* in Kenya**. *PLoS One* 2011, **6**(9):e24767.
13. Brown SD, Utturkar SM, Klingeman DM, Johnson CM, Martin SL, Land ML, Lu TY, Schadt CW, Doktycz MJ, Pelletier DA: **Twenty-one genome sequences from *Pseudomonas* species and 19 genome sequences from diverse bacteria isolated from the rhizosphere and endosphere of *Populus deltoides***. *J Bacteriol* 2012, **194**(21):5991-5993.
14. Shin SC, Kim SJ, Hong SG, Ahn do H, Lee YM, Lee H, Lee J, Park H: **Genome sequence of *Pseudomonas* sp. strain PAMC 25886, isolated from alpine glacial cryoconite**. *J Bacteriol* 2012, **194**(7):1844.
15. Mathimaran N, Srivastava R, Wiemken A, Sharma AK, Boller T: **Genome sequences of two plant growth-promoting fluorescent *Pseudomonas* strains, R62 and Rr81**. *J Bacteriol* 2012, **194**(12):3272-3273.
