# Supplementary material for: Genome sequence reveals that Pseudomonas fluorescens F113 possesses a large and diverse array of systems for rhizosphere function and host interaction
Source: PubMed Central journal article supplement (PMC3570484; doi:10.1186/1471-2164-14-54), 2013-01-25
Supplement: 1471-2164-14-54-S3.pdf [file 1471-2164-14-54-S3.pdf]

| F113 Locus  | Type | Strand | Coordinates    | Length (aa) | Gene  | Function                                             | Organism                                       | Hit ACC        | E-Value | Similarity | Alignment length |
|-------------|------|--------|----------------|-------------|-------|------------------------------------------------------|------------------------------------------------|----------------|---------|------------|------------------|
| PSF113_0319 | CDS  | +      | 382794..382997 | 67          |       | YafQ toxin protein                                   | Pseudomonas sp. GM30                           | ZP_10679031.1  | 5E-36   | 54         | 67               |
| PSF113_0322 | CDS  | -      | 384297..385454 | 385         |       | hypothetical protein                                 | Pseudomonas sp. GM21                           | ZP_10700790.1  | 0       | 346        | 385              |
| PSF113_0453 | CDS  | -      | 539485..540699 | 404         |       | Major facilitator family transporter                 | Pseudomonas sp. GM84                           | ZP_10605236.1  | 0       | 321        | 404              |
| PSF113_0454 | CDS  | -      | 543300..543497 | 65          |       | hypothetical protein                                 | Pseudomonas sp. GM48                           | ZP_10664277.1  | 2E-28   | 54         | 64               |
| PSF113_0738 | CDS  | -      | 894478..895422 | 314         | motD  | MotD                                                 | Pseudomonas extremaustralis 14-3 substr. 14-3b | ZP_10438812.1  | 1E-107  | 174        | 261              |
| PSF113_0739 | CDS  | -      | 895419..896243 | 274         | motC  | Flagellar motor rotation protein MotA                | Pseudomonas extremaustralis 14-3 substr. 14-3b | ZP_10438813.1  | 2E-163  | 234        | 274              |
| PSF113_0740 | CDS  | +      | 896563..897615 | 350         | fliC2 | Flagellar biosynthesis protein FliC                  | Pseudomonas extremaustralis 14-3 substr. 14-3b | ZP_10438814.1  | 0       | 327        | 350              |
| PSF113_0741 | CDS  | +      | 897798..901226 | 1142        |       | TPR domain protein,putative component of TonB system | Bordetella petrii DSM 12804                    | YP_001631626.1 | 0       | 512        | 1111             |
| PSF113_0743 | CDS  | -      | 902625..903317 | 230         | fliA2 | RNA polymerase sigma factor for flagellar operon     | Pseudomonas extremaustralis 14-3 substr. 14-3b | ZP_10439966.1  | 3E-141  | 197        | 230              |
| PSF113_0745 | CDS  | -      | 903997..906291 | 764         | flhF2 | Flagellar biosynthesis protein FlhF                  | Azotobacter vinelandii DJ                      | YP_002799937.1 | 0       | 380        | 753              |
| PSF113_0747 | CDS  | -      | 908378..909547 | 389         | flhB  | Flagellar biosynthesis protein FlhB                  | Pseudomonas extremaustralis 14-3 substr. 14-3b | ZP_10439969.1  | 0       | 332        | 386              |
| PSF113_0748 | CDS  | -      | 909651..910553 | 300         | motB2 | Flagellar motor rotation protein MotB                | Pseudomonas extremaustralis 14-3 substr. 14-3b | ZP_10439970.1  | 5E-175  | 242        | 280              |
| PSF113_0749 | CDS  | -      | 910550..911434 | 294         | motA2 | Flagellar motor rotation protein MotA                | Enterobacteriaceae bacterium 9_2_54FAA         | ZP_07950070.1  | 8E-118  | 173        | 281              |
| PSF113_0750 | CDS  | -      | 911674..912240 | 188         | flhC  | Flagellar transcriptional activator FlhC             | Pseudomonas extremaustralis 14-3 substr. 14-3b | ZP_10439972.1  | 9E-126  | 175        | 187              |
| PSF113_0751 | CDS  | -      | 912244..912486 | 80          | flhD  | FlhD                                                 | Pseudomonas extremaustralis 14-3 substr. 14-3b | ZP_10439973.1  | 9E-46   | 73         | 80               |
| PSF113_0753 | CDS  | -      | 913278..913592 | 104         | fliS2 | FliS2                                                | Pseudomonas extremaustralis 14-3 substr. 14-3b | ZP_10439975.1  | 5E-55   | 90         | 104              |
| PSF113_0754 | CDS  | -      | 913704..915113 | 469         | fliD2 | Flagellar hook-associated protein FliD               | Pseudomonas extremaustralis 14-3 substr. 14-3b | ZP_10439976.1  | 0       | 376        | 453              |
| PSF113_0755 | CDS  | -      | 915302..915622 | 106         | fliE2 | FliE2                                                | Pseudomonas extremaustralis 14-3 substr. 14-3b | ZP_10439977.1  | 2E-49   | 84         | 104              |
| PSF113_0756 | CDS  | +      | 915882..917606 | 574         | fliF2 | Flagellar M-ring protein FliF                        | Pseudomonas extremaustralis 14-3 substr. 14-3b | ZP_10439978.1  | 0       | 465        | 577              |
| PSF113_0757 | CDS  | +      | 917615..918601 | 328         | fliG2 | Flagellar motor switch protein FliG                  | Pseudomonas extremaustralis 14-3 substr. 14-3b | ZP_10439979.1  | 0       | 303        | 328              |
| PSF113_0758 | CDS  | +      | 918594..919316 | 240         | fliH2 | FliH2                                                | Pseudomonas extremaustralis 14-3 substr. 14-3b | ZP_10439980.1  | 5E-112  | 164        | 219              |
| PSF113_0760 | CDS  | +      | 920733..921203 | 156         | fliJ2 | FliJ2                                                | Pseudomonas extremaustralis 14-3 substr. 14-3b | ZP_10439982.1  | 5E-81   | 125        | 155              |
| PSF113_0761 | CDS  | +      | 921659..922600 | 313         | fliK2 | FliK2                                                | Polaromonas sp. CF318                          | ZP_10562011.1  | 2E-21   | 51         | 98               |
| PSF113_0762 | CDS  | +      | 922724..923197 | 157         | fliL2 | FliL2                                                | Pseudomonas extremaustralis 14-3 substr. 14-3b | ZP_10439984.1  | 1E-54   | 103        | 156              |
| PSF113_0763 | CDS  | +      | 923201..924253 | 350         | fliM2 | Flagellar motor switch protein FliM                  | Azotobacter vinelandii DJ                      | YP_002799578.1 | 0       | 270        | 350              |
| PSF113_0764 | CDS  | +      | 924246..924716 | 156         | fliN2 | FliN2                                                | Pseudomonas extremaustralis 14-3 substr. 14-3b | ZP_10439986.1  | 1E-65   | 119        | 159              |
| PSF113_0765 | CDS  | +      | 924770..925135 | 121         | fliO2 | FliO2                                                | Pseudomonas extremaustralis 14-3 substr. 14-3b | ZP_10439987.1  | 2E-35   | 75         | 112              |
| PSF113_0766 | CDS  | +      | 925132..925902 | 256         | fliP2 | Flagellar biosynthesis protein FliP                  | Pseudomonas extremaustralis 14-3 substr. 14-3b | ZP_10439988.1  | 8E-135  | 210        | 226              |
| PSF113_0767 | CDS  | +      | 925928..926197 | 89          | fliQ2 | FliQ2                                                | Pseudomonas extremaustralis 14-3 substr. 14-3b | ZP_10439989.1  | 3E-52   | 84         | 89               |

| F113 Locus  | Type | Strand | Coordinates      | Length (aa) | Gene  | Function                                                                                     | Organism                                         | Hit ACC        | E-Value | Similarity | Alignment length |
|-------------|------|--------|------------------|-------------|-------|----------------------------------------------------------------------------------------------|--------------------------------------------------|----------------|---------|------------|------------------|
| PSF113_0768 | CDS  | +      | 926203..926991   | 262         | fliR2 | FliR2                                                                                        | Pseudomonas extremaustralis 14-3 substr. 14-3b   | ZP_10439990.1  | 4E-150  | 235        | 262              |
| PSF113_0769 | CDS  | -      | 927134..928330   | 398         | flgL2 | FlgL2                                                                                        | Pseudomonas extremaustralis 14-3 substr. 14-3b   | ZP_10439991.1  | 0       | 352        | 398              |
| PSF113_0770 | CDS  | -      | 928357..929967   | 536         | flgK2 | FlgK2                                                                                        | Pseudomonas extremaustralis 14-3 substr. 14-3b   | ZP_10439992.1  | 0       | 462        | 535              |
| PSF113_0771 | CDS  | -      | 930110..931072   | 320         | flgJ2 | FlgJ2                                                                                        | Pseudomonas extremaustralis 14-3 substr. 14-3b   | ZP_10439993.1  | 2E-170  | 240        | 303              |
| PSF113_0772 | CDS  | -      | 931072..932226   | 384         | flgI2 | Flagellar P-ring protein FlgI                                                                | Azotobacter vinelandii DJ                        | YP_002799569.1 | 0       | 262        | 350              |
| PSF113_0773 | CDS  | -      | 932238..932882   | 214         | flgH2 | Flagellar L-ring protein FlgH                                                                | Pseudomonas extremaustralis 14-3 substr. 14-3b   | ZP_10439995.1  | 2E-123  | 184        | 213              |
| PSF113_0774 | CDS  | -      | 932942..933724   | 260         | flgG2 | Flagellar basal-body rod protein FlgG                                                        | Pseudomonas extremaustralis 14-3 substr. 14-3b   | ZP_10439996.1  | 4E-180  | 247        | 260              |
| PSF113_0775 | CDS  | -      | 933756..934502   | 248         | flgF2 | Flagellar basal-body rod protein FlgF                                                        | Pseudomonas extremaustralis 14-3 substr. 14-3b   | ZP_10439997.1  | 2E-151  | 216        | 241              |
| PSF113_0776 | CDS  | -      | 934515..935663   | 382         | flgE2 | Flagellar hook protein FlgE                                                                  | Pseudomonas extremaustralis 14-3 substr. 14-3b   | ZP_10439998.1  | 0       | 343        | 382              |
| PSF113_0777 | CDS  | -      | 935746..936423   | 225         | flgD2 | FlgD2                                                                                        | Pseudomonas extremaustralis 14-3 substr. 14-3b   | ZP_10439999.1  | 3E-126  | 204        | 225              |
| PSF113_0778 | CDS  | -      | 936427..936834   | 135         | flgC2 | Flagellar basal-body rod protein FlgC                                                        | Pseudomonas extremaustralis 14-3 substr. 14-3b   | ZP_10440000.1  | 5E-89   | 130        | 135              |
| PSF113_0779 | CDS  | -      | 936850..937263   | 137         | flgB2 | FlgB2                                                                                        | Pseudomonas extremaustralis 14-3 substr. 14-3b   | ZP_10440001.1  | 8E-82   | 124        | 137              |
| PSF113_0780 | CDS  | +      | 937426..938136   | 236         | flgA2 | FlgA2                                                                                        | Pseudomonas extremaustralis 14-3 substr. 14-3b   | ZP_10440002.1  | 1E-99   | 149        | 207              |
| PSF113_0781 | CDS  | +      | 938322..938519   | 65          | flgM2 | FlgM2                                                                                        | Pseudomonas extremaustralis 14-3 substr. 14-3b   | ZP_10440003.1  | 1E-15   | 39         | 59               |
| PSF113_0782 | CDS  | +      | 938559..938990   | 143         | flgN2 | FlgN2                                                                                        | Pseudomonas extremaustralis 14-3 substr. 14-3b   | ZP_10440004.1  | 4E-65   | 104        | 137              |
| PSF113_0810 | CDS  | -      | 980757..981017   | 86          | higB2 | HigB                                                                                         | Delftia acidovorans SPH-1                        | YP_001562241.1 | 2E-31   | 56         | 79               |
| PSF113_0811 | CDS  | -      | 981310..982338   | 342         |       | transcriptional regulator, AraC family                                                       | Pseudomonas putida S16                           | YP_004700345.1 | 1E-156  | 213        | 246              |
| PSF113_0812 | CDS  | +      | 982497..983366   | 289         |       | putative solute-binding component of ABC transporter                                         | Pseudomonas putida S16                           | YP_004700348.1 | 0       | 255        | 290              |
| PSF113_0816 | CDS  | +      | 985574..987001   | 475         |       | Aspartyl-tRNA(Asn)amidotransferase subunit A @ Glutamyl-tRNA(Gln) amidotransferase subunit A | Acidovorax sp. CF316                             | ZP_10391513.1  | 0       | 267        | 457              |
| PSF113_0819 | CDS  | -      | 989330..990913   | 527         |       | Phytoene dehydrogenase-related protein                                                       | Agrobacterium radiobacter K84                    | YP_002546768.1 | 0       | 326        | 526              |
| PSF113_0822 | CDS  | +      | 992664..993443   | 259         |       | 3-oxoacyl-[acyl-carrier protein] reductase (EC 1.1.1.100)                                    | Burkholderia sp. H160                            | ZP_03263858.1  | 3E-125  | 177        | 257              |
| PSF113_0824 | CDS  | +      | 994800..995816   | 338         |       | Possible gluconolactonase                                                                    | Pseudomonas fluorescens SBW25                    | YP_002871579.1 | 0       | 270        | 338              |
| PSF113_0825 | CDS  | +      | 995845..997128   | 427         |       | Histidinol dehydrogenase(EC 1.1.1.23)                                                        | Methylobacterium nodulans ORS 2060               | YP_002499446.1 | 0       | 284        | 425              |
| PSF113_0826 | CDS  | +      | 997128..997880   | 250         |       | 3-oxoacyl-[acyl-carrier protein] reductase (EC 1.1.1.100)                                    | Runella slithyiformis DSM 19594                  | YP_004654053.1 | 4E-63   | 117        | 258              |
| PSF113_0827 | CDS  | +      | 997891..998322   | 143         |       | Glyoxalase/bleomycin resistance protein/dioxygenase                                          | Burkholderia sp. H160                            | ZP_03263855.1  | 2E-47   | 73         | 128              |
| PSF113_0831 | CDS  | +      | 1001695..1003137 | 480         |       | Carbohydrate-selective porin                                                                 | Pseudomonas fluorescens SBW25                    | YP_002871586.1 | 0       | 303        | 457              |
| PSF113_0832 | CDS  | +      | 1003152..1003895 | 247         |       | 3-oxoacyl-[acyl-carrier protein] reductase                                                   | Burkholderia sp. H160                            | ZP_03263843.1  | 4E-79   | 130        | 244              |
| PSF113_0992 | CDS  | -      | 1194081..1194440 | 119         |       | Mobile element protein                                                                       | Pseudomonas syringae pv. japonica str. M301072   | ZP_16685788.1  | 3E-79   | 117        | 119              |
| PSF113_0994 | CDS  | -      | 1195993..1197582 | 529         |       | lysogenic conversion protein                                                                 | Pseudomonas putida BIRD-1                        | YP_005932322.1 | 7E-69   | 154        | 527              |
| PSF113_0999 | CDS  | -      | 1201927..1202331 | 134         |       | hypothetical protein                                                                         | Pseudomonas fluorescens Q8r1-96                  | ZP_17669922.1  | 1E-85   | 124        | 133              |
| PSF113_1038 | CDS  | +      | 1240087..1240362 | 91          |       | hypothetical protein                                                                         | Pseudomonas syringae pv. aesculi str. NCPPB 3681 | ZP_06459090.1  | 2E-54   | 80         | 91               |
| PSF113_1170 | CDS  | +      | 1390188..1390769 | 193         |       | dockerin type 1 protein                                                                      | Pseudomonas chlororaphis O6                      | ZP_10174710.1  | 2E-107  | 158        | 193              |

| F113 Locus  | Type | Strand | Coordinates      | Length (aa) | Gene  | Function                                                                                    | Organism                                                  | Hit ACC        | E-Value  | Similarity | Alignment length |
|-------------|------|--------|------------------|-------------|-------|---------------------------------------------------------------------------------------------|-----------------------------------------------------------|----------------|----------|------------|------------------|
| PSF113_1178 | CDS  | +      | 1396691..1397128 | 145         |       | prophage tail fimber assembly protein                                                       | <i>Pseudomonas chlororaphis</i> subsp. aureofaciens 30-84 | EJL08081.1     | 8E-09    | 25         | 37               |
| PSF113_1188 | CDS  | -      | 1403843..1404490 | 215         | rfaZ  | RfaZ                                                                                        | <i>Pseudomonas avellanae</i> BPIC 631                     | ZP_16386226.1  | 2E-95    | 135        | 215              |
| PSF113_1463 | CDS  | +      | 1686804..1687034 | 76          |       | hypothetical protein                                                                        | <i>Pseudomonas</i> sp. GM79                               | ZP_10612532.1  | 2E-41    | 63         | 76               |
| PSF113_1539 | CDS  | +      | 1796727..1797500 | 257         |       | Glucose-1-phosphate cytidyltransferase (EC 2.7.7.33)                                        | <i>Pseudomonas</i> sp. GM60                               | ZP_10641967.1  | 0        | 245        | 257              |
| PSF113_1540 | CDS  | +      | 1797482..1798564 | 360         |       | Similar to CDP-glucose 4,6-dehydratase (EC 4.2.1.45)                                        | <i>Pseudomonas</i> sp. GM74                               | ZP_10629261.1  | 0        | 318        | 360              |
| PSF113_1541 | CDS  | +      | 1798561..1799121 | 186         |       | dTDP-4-dehydrorhamnose 3,5-epimerase                                                        | <i>Pseudomonas</i> sp. GM80                               | ZP_10606112.1  | 1E-123   | 170        | 186              |
| PSF113_1542 | CDS  | +      | 1799121..1799990 | 289         |       | UDP-glucose 4-epimerase                                                                     | <i>Pseudomonas</i> sp. GM80                               | ZP_10606111.1  | 5E-169   | 233        | 284              |
| PSF113_1543 | CDS  | +      | 1799980..1801050 | 356         |       | C-methyltransferase                                                                         | <i>Pseudomonas</i> sp. GM74                               | ZP_10629265.1  | 0        | 291        | 356              |
| PSF113_1544 | CDS  | +      | 1801066..1801803 | 245         |       | Cephalosporin hydroxylase                                                                   | <i>Pseudomonas fluorescens</i> R124                       | ZP_18345414.1  | 5E-128   | 170        | 239              |
| PSF113_1547 | CDS  | +      | 1805812..1806972 | 386         |       | DegT/DnrJ/EryC1/StrS aminotransferase                                                       | <i>Pseudomonas</i> sp. GM17                               | ZP_10708182.1  | 0        | 320        | 386              |
| PSF113_1548 | CDS  | +      | 1806979..1807680 | 233         |       | N-Acetylneuraminate cytidyltransferase                                                      | <i>Pseudomonas</i> sp. GM50                               | ZP_10649148.1  | 7E-141   | 199        | 231              |
| PSF113_1549 | CDS  | +      | 1807677..1809182 | 501         |       | Pseudaminic acid cytidyltransferase (EC 2.7.7.43)                                           | <i>Pseudomonas fluorescens</i> R124                       | ZP_18345418.1  | 0        | 379        | 501              |
| PSF113_1550 | CDS  | +      | 1809175..1810227 | 350         |       | N-acetylneuraminate synthase (EC 2.5.1.56)                                                  | <i>Pseudomonas</i> sp. GM80                               | ZP_10606103.1  | 0        | 312        | 350              |
| PSF113_1552 | CDS  | +      | 1811395..1812726 | 443         |       | Conserved domain protein                                                                    | <i>Pseudomonas</i> sp. GM25                               | ZP_10688563.1  | 0        | 288        | 430              |
| PSF113_1553 | CDS  | +      | 1812723..1812992 | 89          |       | hypothetical protein                                                                        | <i>Pseudomonas</i> sp. GM102                              | ZP_10594708.1  | 1E-25    | 49         | 84               |
| PSF113_1581 | CDS  | -      | 1838167..1840368 | 733         |       | hypothetical protein                                                                        | <i>Pseudomonas viridiflava</i> UASWS0038                  | ZP_11289897.1  | 2E-92    | 167        | 369              |
| PSF113_1647 | CDS  | +      | 1913982..1915241 | 419         | matE  | MatE                                                                                        | <i>Pseudomonas aeruginosa</i> UCBPP-PA14                  | YP_790024.1    | 2E-148   | 234        | 412              |
| PSF113_1651 | CDS  | +      | 1918441..1919535 | 364         |       | glycosyl hydrolase bnr repeat-containing protein                                            | <i>gamma</i> proteobacterium HTCC2207                     | ZP_01225182.1  | 2E-80    | 132        | 342              |
| PSF113_1652 | CDS  | +      | 1919557..1921701 | 714         |       | putative zinc-binding dehydrogenase                                                         | <i>Ralstonia solanacearum</i> CFBP2957                    | YP_003748271.1 | 0        | 487        | 686              |
| PSF113_1653 | CDS  | +      | 1921710..1923356 | 548         |       | Heparinase II/III-like                                                                      | <i>Pseudomonas aeruginosa</i> UCBPP-PA14                  | YP_790028.1    | 0        | 360        | 547              |
| PSF113_1654 | CDS  | +      | 1923359..1924543 | 394         |       | hypothetical protein                                                                        | <i>Pseudomonas</i> sp. GM67                               | ZP_10634475.1  | 0        | 257        | 388              |
| PSF113_1657 | CDS  | +      | 1926872..1928065 | 397         |       | acyltransferase 3                                                                           | <i>Pseudomonas</i> sp. GM55                               | ZP_10643050.1  | 3E-160   | 235        | 398              |
| PSF113_1759 | CDS  | -      | 2049894..2050790 | 298         |       | Transcriptional regulator, LysR family                                                      | <i>Pseudomonas</i> sp. GM60                               | ZP_10636446.1  | 2E-171   | 242        | 295              |
| PSF113_1760 | CDS  | +      | 2050894..2051742 | 282         |       | ThiJ/Pfpl family protein                                                                    | <i>Pseudomonas</i> sp. GM67                               | ZP_10634853.1  | 3E-142   | 200        | 279              |
| PSF113_1793 | CDS  | +      | 2090217..2090471 | 84          | iacP  | IacP                                                                                        | <i>Pseudomonas</i> sp. GM49                               | ZP_10654481.1  | 0,000001 | 21         | 37               |
| PSF113_1800 | CDS  | +      | 2095052..2095618 | 188         | orgA  | OrgA                                                                                        | <i>Pseudomonas fluorescens</i> Q2-87                      | ZP_17084184.1  | 5E-89    | 138        | 182              |
| PSF113_1925 | CDS  | -      | 2257555..2258784 | 409         |       | Mobile element protein                                                                      | <i>Pseudomonas</i> sp. GM79                               | ZP_10618130.1  | 0        | 280        | 349              |
| PSF113_1937 | CDS  | +      | 2271783..2272937 | 384         |       | hypothetical protein                                                                        | <i>Burkholderia phymatum</i> STM815                       | YP_001863389.1 | 7E-36    | 108        | 307              |
| PSF113_2025 | CDS  | -      | 2368301..2369224 | 307         |       | Inositol transport system sugar-binding protein                                             | <i>Pseudomonas fluorescens</i> SS101                      | ZP_17665903.1  | 0        | 259        | 307              |
| PSF113_2026 | CDS  | -      | 2369273..2370427 | 384         |       | Protein involved in biosynthesis of mitomycin antibiotics/polyketide fumonisin              | <i>Pseudomonas fragi</i> A22                              | ZP_10850286.1  | 0        | 274        | 382              |
| PSF113_2027 | CDS  | -      | 2370424..2371272 | 282         |       | Dehydrogenases with different specificities (related to short-chain alcohol dehydrogenases) | <i>Pseudomonas</i> sp. GM78                               | ZP_10624378.1  | 0        | 271        | 282              |
| PSF113_2028 | CDS  | +      | 2371397..2372422 | 341         |       | dna-binding protein                                                                         | <i>Pseudomonas</i> sp. M47T1                              | ZP_10148580.1  | 0        | 310        | 341              |
| PSF113_2029 | CDS  | -      | 2372432..2373499 | 355         | pnpD2 | Alcohol dehydrogenase (EC 1.1.1.1)                                                          | <i>Pseudomonas</i> sp. GM78                               | ZP_10623894.1  | 0        | 333        | 354              |
| PSF113_2030 | CDS  | -      | 2373504..2373917 | 137         |       | hypothetical protein                                                                        | <i>Pseudomonas</i> sp. GM79                               | ZP_10616321.1  | 8E-91    | 127        | 137              |
| PSF113_2031 | CDS  | -      | 2373956..2374801 | 281         | pcpA  | PcpA                                                                                        | <i>Pseudomonas</i> sp. GM79                               | ZP_10616322.1  | 0        | 261        | 281              |
| PSF113_2032 | CDS  | +      | 2374972..2375886 | 304         |       | transcriptional regulator, LysR family                                                      | <i>Pseudomonas</i> sp. GM79                               | ZP_10616323.1  | 0        | 303        | 304              |
| PSF113_2034 | CDS  | +      | 2377611..2379047 | 478         |       | Permeases of the major facilitator superfamily                                              | <i>Pantoea</i> sp. GM01                                   | ZP_10556988.1  | 0        | 267        | 475              |
| PSF113_2035 | CDS  | +      | 2379125..2380021 | 298         |       | Catechol 1,2-dioxygenase 1 (EC 1.13.11.1)                                                   | <i>Pseudomonas</i> sp. GM79                               | ZP_10616326.1  | 0        | 291        | 298              |
| PSF113_2036 | CDS  | +      | 2380211..2380945 | 244         |       | Xylose isomerase domain protein TIM barrel                                                  | <i>Pseudomonas</i> sp. GM79                               | ZP_10616327.1  | 0        | 288        | 290              |
| PSF113_2037 | CDS  | +      | 2381014..2382009 | 331         |       | Myo-inositol 2-dehydrogenase (EC 1.1.1.18)                                                  | <i>Pseudomonas</i> sp. GM78                               | ZP_10623887.1  | 0        | 313        | 331              |
| PSF113_2038 | CDS  | +      | 2382059..2383150 | 363         |       | NADH-dependent dehydrogenase                                                                | <i>Pseudomonas</i> sp. GM78                               | ZP_10623886.1  | 0        | 356        | 363              |

| F113 Locus  | Type | Strand | Coordinates      | Length (aa) | Gene  | Function                                                                                         | Organism                            | Hit ACC        | E-Value | Similarity | Alignment length |
|-------------|------|--------|------------------|-------------|-------|--------------------------------------------------------------------------------------------------|-------------------------------------|----------------|---------|------------|------------------|
| PSF113_2042 | CDS  | +      | 2387126..2387428 | 100         |       | stress responsive alpha-beta barrel domain protein                                               | Burkholderia sp. H160               | ZP_03269771.1  | 3E-36   | 60         | 97               |
| PSF113_2145 | CDS  | +      | 2513232..2513567 | 111         |       | acetyltransferase, GNAT family                                                                   | Pseudomonas mandelii JR-1           | ZP_11108873.1  | 7E-55   | 83         | 107              |
| PSF113_2225 | CDS  | -      | 2599711..2600664 | 317         |       | endonuclease/exonuclease/phosphatase family                                                      | Pseudomonas aeruginosa PA7          | YP_001348249.1 | 8E-35   | 103        | 312              |
| PSF113_2260 | CDS  | +      | 2638804..2639544 | 246         | azlC3 | AzIC                                                                                             | Pseudomonas sp. GM60                | ZP_10639841.1  | 6E-134  | 189        | 213              |
| PSF113_2261 | CDS  | +      | 2639541..2639867 | 108         |       | branched-chain amino acid transport                                                              | Pseudomonas sp. GM67                | ZP_10632735.1  | 2E-54   | 99         | 108              |
| PSF113_2274 | CDS  | +      | 2657055..2658269 | 404         |       | Response regulator receiver domain protein                                                       | Nitrosospira multiformis ATCC 25196 | YP_411242.1    | 6E-131  | 201        | 401              |
| PSF113_2442 | CDS  | -      | 2850226..2851224 | 332         |       | perosamine synthase                                                                              | Pseudomonas sp. GM17                | ZP_10709575.1  | 1E-154  | 229        | 293              |
| PSF113_2443 | CDS  | -      | 2851215..2851724 | 169         |       | hypothetical protein                                                                             | Pseudomonas sp. GM17                | ZP_10709576.1  | 7E-107  | 155        | 169              |
| PSF113_2445 | CDS  | -      | 2862223..2863581 | 452         |       | hypothetical protein                                                                             | Nitrolancetus hollandicus Lb        | ZP_10246177.1  | 2E-91   | 204        | 472              |
| PSF113_2447 | CDS  | -      | 2867162..2867848 | 228         |       | hypothetical protein                                                                             | Pseudomonas fragi A22               | ZP_10849905.1  | 12      | 38         | 123              |
| PSF113_2448 | CDS  | -      | 2868202..2868537 | 111         |       | hypothetical protein                                                                             | Nitrolancetus hollandicus Lb        | ZP_10246176.1  | 2E-09   | 37         | 107              |
| PSF113_2449 | CDS  | -      | 2868865..2869620 | 251         |       | iron ABC transporter ATP-binding protein                                                         | Pseudomonas sp. GM67                | ZP_10632022.1  | 1E-164  | 231        | 251              |
| PSF113_2450 | CDS  | -      | 2869614..2870675 | 353         | fecD  | Iron(III) dicitrate transport system permease protein FecD (TC 3.A.1.14.1)                       | Pseudomonas mandelii JR-1           | ZP_11114318.1  | 0       | 325        | 352              |
| PSF113_2451 | CDS  | -      | 2870672..2871859 | 395         |       | periplasmic binding protein                                                                      | Pseudomonas sp. GM49                | ZP_10655015.1  | 0       | 339        | 395              |
| PSF113_2453 | CDS  | -      | 2874435..2875412 | 325         |       | Fe2+-dicitrate sensor,membrane component                                                         | Pseudomonas sp. GM41(2012)          | ZP_10670704.1  | 0       | 278        | 325              |
| PSF113_2454 | CDS  | -      | 2875413..2875946 | 177         |       | RNA polymerase sigma-70 factor, ECF subfamily                                                    | Pseudomonas sp. GM41(2012)          | ZP_10670703.1  | 6E-112  | 157        | 171              |
| PSF113_2455 | CDS  | -      | 2876015..2877241 | 408         |       | Multidrug resistance protein B                                                                   | Pseudomonas sp. GM67                | ZP_10632028.1  | 0       | 331        | 403              |
| PSF113_2468 | CDS  | -      | 2889865..2895588 | 1907        |       | hypothetical protein                                                                             | Pseudomonas sp. GM41(2012)          | ZP_10667339.1  | 3E-23   | 187        | 654              |
| PSF113_2571 | CDS  | -      | 3027075..3028190 | 371         |       | Phenylpropionate dioxygenase and related ring-hydroxylating dioxygenases, large terminal subunit | Pseudomonas aeruginosa ATCC 700888  | ZP_15626210.1  | 0       | 273        | 364              |
| PSF113_2574 | CDS  | -      | 3030979..3031806 | 275         |       | transcriptional regulatory protein                                                               | Burkholderia sp. Ch1-1              | ZP_10031946.1  | 2E-41   | 85         | 267              |
| PSF113_2578 | CDS  | -      | 3035847..3036497 | 216         |       | hypothetical protein                                                                             | Leptosphaeria maculans JN3          | XP_003840512.1 | 2E-30   | 79         | 225              |
| PSF113_2580 | CDS  | -      | 3039138..3040232 | 364         |       | bnr domain-containing protein                                                                    | Pseudomonas fluorescens Q8r1-96     | ZP_17671118.1  | 4E-91   | 170        | 358              |
| PSF113_2583 | CDS  | +      | 3043484..3044029 | 181         |       | hypothetical protein                                                                             | Sphingobium sp. SYK-6               | YP_004834889.1 | 2E-45   | 76         | 160              |
| PSF113_2584 | CDS  | +      | 3044049..3044504 | 151         |       | aromatic-ring-hydroxylating dioxygenase beta subunit                                             | Sphingobium sp. SYK-6               | YP_004835931.1 | 6E-27   | 59         | 147              |
| PSF113_2585 | CDS  | +      | 3044563..3045504 | 313         |       | NmrA-like protein                                                                                | Frankia sp. QA3                     | ZP_10309179.1  | 3E-105  | 172        | 299              |
| PSF113_2605 | CDS  | -      | 3065028..3065993 | 321         | pdtC  | PdtC, QsbA                                                                                       | Pseudomonas sp. GM102               | ZP_10599892.1  | 0       | 287        | 321              |
| PSF113_2607 | CDS  | +      | 3068150..3069193 | 347         | ptdP  | PtdP, QbsJ                                                                                       | Pseudomonas sp. GM102               | ZP_10599890.1  | 0       | 278        | 343              |
| PSF113_2608 | CDS  | +      | 3069190..3070482 | 430         | ampG2 | AmpG                                                                                             | Pseudomonas sp. GM50                | ZP_10650419.1  | 2E-174  | 309        | 407              |
| PSF113_2609 | CDS  | +      | 3070641..3072908 | 755         |       | Methionine ABC transporter ATP-binding protein                                                   | Ralstonia solanacearum GMI1000      | NP_521762.1    | 0       | 537        | 808              |
| PSF113_2610 | CDS  | +      | 3072932..3075454 | 840         |       | Putrescine aminotransferase (EC 2.6.1.82)                                                        | Serratia sp. AS12                   | YP_004500188.1 | 0       | 433        | 852              |
| PSF113_2611 | CDS  | +      | 3075828..3076871 | 347         | pdtF  | Sulfur carrier protein adenyllyltransferase ThiF                                                 | Pseudomonas sp. GM102               | ZP_10599886.1  | 0       | 308        | 347              |
| PSF113_2612 | CDS  | +      | 3076893..3077300 | 135         | pdtG  | PdtG, QsbD                                                                                       | Pseudomonas sp. GM50                | ZP_10650423.1  | 1E-79   | 117        | 134              |
| PSF113_2613 | CDS  | +      | 3077372..3077644 | 90          | pdtH  | PdtH, QsbE                                                                                       | Pseudomonas sp. GM102               | ZP_10599884.1  | 7E-50   | 78         | 90               |
| PSF113_2614 | CDS  | +      | 3077729..3079582 | 617         |       | hypothetical protein                                                                             | Pseudomonas sp. TJI-51              | ZP_08143500.1  | 0       | 298        | 547              |
| PSF113_2615 | CDS  | +      | 3079579..3081228 | 549         | pdtJ  | Long-chain-fatty-acid--CoA ligase (EC 6.2.1.3)                                                   | Ralstonia solanacearum Po82         | YP_006032419.1 | 0       | 378        | 548              |
| PSF113_2616 | CDS  | +      | 3081267..3082442 | 391         | pdtO  | PdtO                                                                                             | Pseudomonas sp. GM50                | ZP_10650427.1  | 0       | 344        | 391              |
| PSF113_2617 | CDS  | +      | 3082439..3083644 | 401         |       | hypothetical protein                                                                             | Pseudomonas sp. GM50                | ZP_10650428.1  | 0       | 334        | 402              |
| PSF113_2618 | CDS  | +      | 3083641..3084723 | 360         |       | unsaturated glucuronyl hydrolase                                                                 | Pseudomonas sp. GM102               | ZP_10599879.1  | 2E-150  | 242        | 366              |
| PSF113_2736 | CDS  | +      | 3218181..3219521 | 446         | tolC  | TolC                                                                                             | Pseudomonas mendocina ymp           | YP_001186218.1 | 7E-167  | 258        | 432              |
| PSF113_2750 | CDS  | +      | 3234170..3234487 | 105         |       | transcriptional regulator                                                                        | Pseudomonas sp. GM74                | ZP_10629848.1  | 2E-64   | 100        | 105              |
| PSF113_2751 | CDS  | +      | 3234480..3235751 | 423         | hipA2 | HIP A PROTEIN                                                                                    | Pseudomonas fluorescens WH6         | ZP_07776376.1  | 0       | 398        | 419              |
| PSF113_2752 | CDS  | +      | 3236163..3237206 | 347         |       | Dihydroflavonol-4-reductase (EC 1.1.1.219)                                                       | Pseudomonas sp. HYS                 | ZP_11261341.1  | 0       | 254        | 347              |
| PSF113_2865 | CDS  | +      | 3375210..3375602 | 130         |       | putative translation initiation inhibitor protein                                                | Novosphingobium sp. AP12            | ZP_10744851.1  | 7E-82   | 116        | 130              |
| PSF113_2866 | CDS  | +      | 3375665..3376489 | 274         |       | Saccharopine dehydrogenase                                                                       | Pseudomonas sp. GM24                | ZP_10694342.1  | 4E-87   | 124        | 168              |

| F113 Locus  | Type | Strand | Coordinates      | Length (aa) | Gene  | Function                                                                          | Organism                                              | Hit ACC        | E-Value | Similarity | Alignment length |
|-------------|------|--------|------------------|-------------|-------|-----------------------------------------------------------------------------------|-------------------------------------------------------|----------------|---------|------------|------------------|
| PSF113_2875 | CDS  | +      | 3385596..3386573 | 325         |       | probable transcription regulator PA3771                                           | Pseudomonas chlororaphis O6                           | ZP_10175621.1  | 0       | 269        | 325              |
| PSF113_2876 | CDS  | +      | 3386711..3387586 | 291         | qbdB  | QbdB                                                                              | Pseudomonas sp. GM17                                  | ZP_10712333.1  | 0       | 263        | 291              |
| PSF113_2877 | CDS  | +      | 3387609..3388772 | 387         |       | Permeases of the major facilitator superfamily                                    | Pseudomonas aeruginosa 138244                         | ZP_11915370.1  | 9E-139  | 261        | 351              |
| PSF113_2878 | CDS  | +      | 3388807..3389919 | 370         |       | Deacetylases, including yeast histone deacetylase and acetoin utilization protein | Pseudomonas aeruginosa PAb1                           | ZP_06877188.1  | 0       | 270        | 365              |
| PSF113_3032 | CDS  | -      | 3583921..3584643 | 240         |       | hypothetical protein                                                              | Pseudomonas mandelii JR-1                             | ZP_11110187.1  | 8E-151  | 208        | 239              |
| PSF113_3033 | CDS  | -      | 3584806..3585750 | 314         |       | hypothetical protein                                                              | Pseudomonas viridiflava UASWS0038                     | ZP_11286954.1  | 2E-87   | 159        | 317              |
| PSF113_3034 | CDS  | -      | 3585747..3587411 | 554         |       | hypothetical protein                                                              | Pseudomonas viridiflava UASWS0038                     | ZP_11286953.1  | 0       | 302        | 566              |
| PSF113_3036 | CDS  | -      | 3589239..3589994 | 251         |       | cobalamin biosynthetic protein                                                    | Pseudomonas protegens Pf-5                            | YP_259560.1    | 8E-93   | 139        | 239              |
| PSF113_3123 | CDS  | -      | 3682946..3684298 | 450         |       | serine protease,subtilase family                                                  | Arsenophonus nasoniae                                 | CBA74876.1     | 1E-108  | 204        | 430              |
| PSF113_3132 | CDS  | -      | 3692953..3694023 | 356         |       | putative exported protein                                                         | Rhizobium leguminosarum bv. trifolii WSM1325          | YP_002976281.1 | 0       | 244        | 329              |
| PSF113_3136 | CDS  | -      | 3696580..3697176 | 198         |       | twin-arginine translocation pathway signal                                        | Pseudomonas sp. GM24                                  | ZP_10691545.1  | 7E-129  | 178        | 194              |
| PSF113_3151 | CDS  | -      | 3712292..3714682 | 796         |       | Ferrichrome-iron receptor                                                         | Halomonas boliviensis LC1                             | ZP_09186870.1  | 0       | 464        | 661              |
| PSF113_3153 | CDS  | -      | 3715768..3716166 | 132         |       | RNA polymerase sigma-70 factor, ECF subfamily                                     | Pseudomonas sp. GM80                                  | ZP_10608172.1  | 5E-85   | 128        | 132              |
| PSF113_3157 | CDS  | -      | 3717668..3718996 | 442         |       | periplasmic serine protease                                                       | Pseudomonas sp. GM67                                  | ZP_10632736.1  | 5E-28   | 64         | 151              |
| PSF113_3298 | CDS  | -      | 3889413..3889667 | 84          |       | putative membrane protein                                                         | Pseudomonas sp. GM102                                 | ZP_10597742.1  | 2E-44   | 75         | 84               |
| PSF113_3302 | CDS  | +      | 3892671..3892844 | 57          |       | hypothetical protein                                                              | Pseudomonas fluorescens Pf0-1                         | YP_348753.1    | 9E-28   | 51         | 53               |
| PSF113_3303 | CDS  | +      | 3893476..3894552 | 358         |       | putative membrane protein                                                         | Pseudomonas stutzeri DSM 10701                        | YP_006522558.1 | 5E-171  | 254        | 330              |
| PSF113_3305 | CDS  | +      | 3897288..3898403 | 371         |       | ABC-type multidrug transport system, permease component                           | Pseudomonas stutzeri A1501                            | YP_001170635.1 | 0       | 273        | 371              |
| PSF113_3306 | CDS  | -      | 3898507..3898764 | 85          |       | Acetate kinase                                                                    | Rhodanobacter sp. 2APBS1                              | ZP_08953387.1  | 2E-16   | 44         | 78               |
| PSF113_3308 | CDS  | +      | 3900162..3902099 | 645         |       | hypothetical protein                                                              | Xanthomonas campestris pv. campestris str. ATCC 33913 | NP_636148.1    | 0       | 321        | 642              |
| PSF113_3309 | CDS  | +      | 3902096..3903097 | 333         |       | putative membrane protein                                                         | Pseudomonas stutzeri TS44                             | ZP_14470735.1  | 3E-143  | 202        | 322              |
| PSF113_3310 | CDS  | +      | 3903240..3904277 | 345         |       | Threonine dehydrogenase and related Zn-dependent dehydrogenases                   | Celeribacter baekdonensis B30                         | ZP_11133190.1  | 0       | 251        | 344              |
| PSF113_3311 | CDS  | +      | 3904883..3906370 | 495         |       | Membrane protein                                                                  | Pseudomonas sp. Ag1                                   | ZP_10475632.1  | 0       | 384        | 455              |
| PSF113_3313 | CDS  | -      | 3906857..3908554 | 565         |       | Sulfate permease                                                                  | Pseudomonas entomophila L48                           | YP_609791.1    | 0       | 464        | 561              |
| PSF113_3350 | CDS  | -      | 3943406..3944590 | 394         |       | 3-ketoacyl-CoA thiolase(EC 2.3.1.16) @ Acetyl-CoA acetyltransferase (EC 2.3.1.9)  | Pseudomonas sp. HYS                                   | ZP_11258811.1  | 0       | 315        | 394              |
| PSF113_3352 | CDS  | +      | 3945924..3947576 | 550         |       | Histidine kinase, HAMP region: Bacterial chemotaxis sensory transducer precursor  | Pseudomonas stutzeri TS44                             | ZP_14470700.1  | 0       | 372        | 549              |
| PSF113_3353 | CDS  | -      | 3947629..3947958 | 109         |       | putative MarR family transcriptional regulator                                    | Pseudomonas sp. GM21                                  | ZP_10695694.1  | 7E-57   | 87         | 108              |
| PSF113_3355 | CDS  | -      | 3948810..3952373 | 1187        |       | Indolepyruvate ferredoxin oxidoreductase, alpha and beta subunits                 | Chromobacterium violaceum ATCC 12472                  | NP_899973.1    | 0       | 694        | 1138             |
| PSF113_3356 | CDS  | +      | 3952747..3954417 | 556         |       | Anaerobic dehydrogenases, typically selenocysteine-containing                     | Pseudomonas stutzeri TS44                             | ZP_14470659.1  | 0       | 413        | 547              |
| PSF113_3363 | CDS  | +      | 3960840..3961766 | 308         |       | Quinone oxidoreductase(EC 1.6.5.5)                                                | Pseudomonas sp. GM21                                  | ZP_10695681.1  | 0       | 292        | 308              |
| PSF113_3365 | CDS  | +      | 3962878..3963765 | 295         | cysB3 | Cys regulon transcriptional activator CysB                                        | Pseudomonas sp. GM21                                  | ZP_10695680.1  | 0       | 264        | 295              |
| PSF113_3366 | CDS  | +      | 3963931..3964968 | 345         | ditL  | 2-amino-3-carboxymuconate-6-semialdehyde decarboxylase (EC 4.1.1.45)              | Pseudomonas aeruginosa 2192                           | ZP_04934604.1  | 0       | 279        | 337              |
| PSF113_3367 | CDS  | -      | 3965013..3965858 | 281         |       | 3-oxoacyl-[acyl-carrier protein] reductase (EC 1.1.1.100)                         | Pseudomonas sp. GM21                                  | ZP_10695668.1  | 0       | 268        | 281              |
| PSF113_3368 | CDS  | +      | 3966280..3967941 | 553         |       | putative exported protein                                                         | Pseudomonas aeruginosa 2192                           | ZP_04934658.1  | 0       | 368        | 555              |
| PSF113_3370 | CDS  | +      | 3969429..3970559 | 376         |       | glycosyl hydrolase                                                                | Pseudomonas sp. GM21                                  | ZP_10695665.1  | 0       | 319        | 376              |
| PSF113_3372 | CDS  | +      | 3973174..3974145 | 323         |       | Lactoylglutathione lyase-related lyase                                            | Glaciicola sp. 4H-3-7+YE-5                            | YP_004432635.1 | 0       | 247        | 320              |
| PSF113_3373 | CDS  | +      | 3974142..3974960 | 272         |       | Enoyl-CoA hydratase (EC 4.2.1.17)                                                 | Pseudomonas sp. GM21                                  | ZP_10695662.1  | 6E-168  | 253        | 272              |
| PSF113_3375 | CDS  | +      | 3975905..3977509 | 534         |       | Beta-carotene ketolase(EC 1.14.-.-)                                               | Marinobacter adhaerens HP15                           | YP_005883709.1 | 0       | 420        | 529              |

| F113 Locus  | Type | Strand | Coordinates      | Length (aa) | Gene  | Function                                                                                         | Organism                        | Hit ACC        | E-Value | Similarity | Alignment length |
|-------------|------|--------|------------------|-------------|-------|--------------------------------------------------------------------------------------------------|---------------------------------|----------------|---------|------------|------------------|
| PSF113_3376 | CDS  | -      | 3977567..3978232 | 221         |       | transcriptional regulator, TetR family                                                           | Pseudomonas sp. GM21            | ZP_10695659.1  | 7E-150  | 208        | 221              |
| PSF113_3377 | CDS  | +      | 3978415..3979692 | 425         | ditQ  | Cytochrome P450                                                                                  | Marinobacter adhaerens HP15     | YP_005883710.1 | 0       | 273        | 418              |
| PSF113_3378 | CDS  | +      | 3979743..3980774 | 343         |       | hypothetical protein                                                                             | Pseudomonas mendocina DLHK      | ZP_15951229.1  | 0       | 302        | 343              |
| PSF113_3380 | CDS  | +      | 3981696..3982997 | 433         |       | Permeases of the major facilitator superfamily                                                   | Pseudomonas sp. GM21            | ZP_10695655.1  | 0       | 382        | 433              |
| PSF113_3381 | CDS  | +      | 3983021..3983371 | 116         |       | hypothetical protein                                                                             | Pseudomonas sp. GM21            | ZP_10695654.1  | 3E-74   | 106        | 116              |
| PSF113_3382 | CDS  | -      | 3983428..3984261 | 277         |       | short-chain dehydrogenase reductase sdr                                                          | Herbaspirillum sp. CF444        | ZP_10722646.1  | 9E-87   | 136        | 275              |
| PSF113_3383 | CDS  | -      | 3984344..3985579 | 411         | ethA  | Ferredoxin reductase                                                                             | Pseudomonas stutzeri TS44       | ZP_14470697.1  | 0       | 341        | 411              |
| PSF113_3384 | CDS  | -      | 3985600..3985920 | 106         |       | Ferredoxin, 2Fe-2S                                                                               | Pseudomonas sp. GM21            | ZP_10695651.1  | 2E-68   | 99         | 106              |
| PSF113_3385 | CDS  | -      | 3985954..3987216 | 420         |       | major facilitator superfamily mfs_1                                                              | Pseudomonas aeruginosa 2192     | ZP_04934635.1  | 0       | 323        | 398              |
| PSF113_3386 | CDS  | +      | 3987569..3987805 | 78          | ditA3 | DitA3                                                                                            | Pseudomonas abietaniphila       | AAD21062.1     | 2E-37   | 60         | 77               |
| PSF113_3387 | CDS  | +      | 3987851..3988615 | 254         | ditB  | Enoyl-[acyl-carrier-protein] reductase [NADH] (EC 1.3.1.9)                                       | Pseudomonas sp. GM21            | ZP_10695648.1  | 2E-173  | 242        | 252              |
| PSF113_3388 | CDS  | +      | 3988677..3989627 | 316         | ditC  | 2,3-dihydroxybiphenyl 1,2-dioxygenase (EC 1.13.11.39)                                            | Pseudomonas aeruginosa 2192     | ZP_04934631.1  | 0       | 263        | 301              |
| PSF113_3389 | CDS  | +      | 3989629..3990513 | 294         | ditD  | Fumarylacetoacetate hydrolase family protein                                                     | Pseudomonas sp. GM21            | ZP_10695646.1  | 0       | 259        | 294              |
| PSF113_3390 | CDS  | +      | 3990548..3990832 | 94          | ditE  | DitE                                                                                             | Pseudomonas sp. GM21            | ZP_10695645.1  | 5E-42   | 73         | 83               |
| PSF113_3391 | CDS  | +      | 3990897..3991682 | 261         | ditR  | Transcriptional regulator, lclR family                                                           | Bordetella bronchiseptica Bbr77 | CCN03081.1     | 7E-43   | 85         | 235              |
| PSF113_3392 | CDS  | -      | 3991692..3992882 | 396         | ditF  | 3-ketoacyl-CoA thiolase(EC 2.3.1.16)                                                             | Marinobacter adhaerens HP15     | YP_005883727.1 | 0       | 305        | 382              |
| PSF113_3393 | CDS  | -      | 3992882..3993280 | 132         |       | hypothetical protein                                                                             | Pseudomonas sp. GM21            | ZP_10695642.1  | 5E-87   | 124        | 132              |
| PSF113_3394 | CDS  | +      | 3993420..3994121 | 233         | ditG  | DitG                                                                                             | Pseudomonas sp. GM21            | ZP_10695641.1  | 6E-150  | 217        | 233              |
| PSF113_3395 | CDS  | +      | 3994127..3995116 | 329         | ditH  | Fumarylacetoacetate hydrolase family protein                                                     | Pseudomonas mendocina DLHK      | ZP_15951247.1  | 0       | 276        | 325              |
| PSF113_3396 | CDS  | +      | 3995231..3996631 | 466         | ditA1 | Large subunit naph/bph dioxygenase                                                               | Pseudomonas aeruginosa 2192     | ZP_04934639.1  | 0       | 318        | 465              |
| PSF113_3397 | CDS  | +      | 3996721..3997296 | 191         | ditA2 | Biphenyl dioxygenase beta subunit (EC 1.14.12.18)                                                | Pseudomonas sp. GM21            | ZP_10695638.1  | 2E-127  | 181        | 191              |
| PSF113_3398 | CDS  | -      | 3997382..3998122 | 246         |       | hypothetical protein                                                                             | Pseudomonas sp. GM21            | ZP_10695637.1  | 2E-134  | 208        | 244              |
| PSF113_3399 | CDS  | +      | 3998224..3999024 | 266         | ditI  | Putative short-chain dehydrogenase/reductase (EC 1.1.1.100)                                      | Pseudomonas sp. GM21            | ZP_10695636.1  | 0       | 261        | 266              |
| PSF113_3400 | CDS  | -      | 3999151..4000782 | 543         | ditJ  | Long-chain-fatty-acid--CoA ligase (EC 6.2.1.3)                                                   | Frankia sp. EUN1f               | ZP_06413672.1  | 2E-177  | 257        | 528              |
| PSF113_3401 | CDS  | +      | 4000967..4001698 | 243         | ditK  | DitK                                                                                             | Pseudomonas sp. GM21            | ZP_10695634.1  | 4E-137  | 192        | 196              |
| PSF113_3402 | CDS  | +      | 4002263..4003096 | 277         | ditL2 | 2-amino-3-carboxymuconate-6-semialdehyde decarboxylase (EC 4.1.1.45)                             | Pseudomonas sp. GM21            | ZP_10695633.1  | 0       | 265        | 277              |
| PSF113_3403 | CDS  | +      | 4003096..4003947 | 283         | ditM  | Fumarylacetoacetate hydrolase family protein                                                     | Pseudomonas sp. GM21            | ZP_10695632.1  | 0       | 269        | 283              |
| PSF113_3404 | CDS  | +      | 4003961..4004863 | 300         | ditN  | 3-hydroxybutyryl-CoA dehydrogenase (EC 1.1.1.157); 3-hydroxyacyl-CoA dehydrogenase (EC 1.1.1.35) | Pseudomonas sp. GM21            | ZP_10695631.1  | 0       | 289        | 300              |
| PSF113_3405 | CDS  | +      | 4004860..4006035 | 391         | ditO  | 3-ketoacyl-CoA thiolase(EC 2.3.1.16) @ Acetyl-CoA acetyltransferase (EC 2.3.1.9)                 | Burkholderia xenovorans LB400   | YP_555845.1    | 0       | 283        | 389              |
| PSF113_3407 | CDS  | +      | 4006680..4007957 | 425         | ditQ2 | Cytochrome P450                                                                                  | Glaciecola sp. 4H-3-7+YE-5      | YP_004432599.1 | 0       | 302        | 424              |
| PSF113_3408 | CDS  | +      | 4008071..4009378 | 435         |       | BarH                                                                                             | Glaciecola sp. 4H-3-7+YE-5      | YP_004432600.1 | 0       | 345        | 435              |
| PSF113_3409 | CDS  | +      | 4009615..4010637 | 340         |       | FadE30                                                                                           | Pseudomonas mendocina DLHK      | ZP_15951261.1  | 0       | 280        | 322              |
| PSF113_3410 | CDS  | +      | 4010637..4011710 | 357         |       | Acyl-CoA dehydrogenase,short-chain specific                                                      | Pseudomonas sp. GM21            | ZP_10696717.1  | 0       | 319        | 357              |
| PSF113_3411 | CDS  | +      | 4011707..4012507 | 266         |       | Enoyl-CoA hydratase (EC 4.2.1.17)                                                                | Pseudomonas sp. GM21            | ZP_10696716.1  | 0       | 258        | 266              |
| PSF113_3412 | CDS  | +      | 4012550..4013674 | 374         |       | Acyl-CoA dehydrogenase,short-chain specific (EC 1.3.99.2)                                        | Pseudomonas aeruginosa 2192     | ZP_04934607.1  | 0       | 344        | 374              |
| PSF113_3413 | CDS  | +      | 4013699..4014250 | 183         |       | Glutathione peroxidase(EC 1.11.1.9)                                                              | Pseudomonas sp. GM21            | ZP_10696714.1  | 6E-115  | 159        | 183              |
| PSF113_3414 | CDS  | +      | 4014253..4015113 | 286         |       | Pantoate--beta-alanine ligase (EC 6.3.2.1)                                                       | Pseudomonas sp. GM21            | ZP_10696713.1  | 2E-168  | 231        | 286              |
| PSF113_3415 | CDS  | +      | 4015202..4016059 | 285         |       | methyl-accepting chemotaxis protein                                                              | Pseudomonas sp. GM21            | ZP_10696712.1  | 0       | 256        | 285              |
| PSF113_3416 | CDS  | +      | 4016066..4017271 | 401         |       | major facilitator superfamily transporter                                                        | Pseudomonas sp. GM21            | ZP_10696710.1  | 0       | 362        | 401              |
| PSF113_3439 | CDS  | +      | 4050097..4051026 | 309         | pnpR  | Transcriptional regulator, LysR family                                                           | Pseudomonas sp. Ny2402          | ACZ51387.1     | 0       | 263        | 308              |
| PSF113_3440 | CDS  | +      | 4051143..4051637 | 164         | pnpC1 | PnpC1                                                                                            | Pseudomonas sp. GM78            | ZP_10624263.1  | 4E-107  | 149        | 164              |

| F113 Locus  | Type | Strand | Coordinates      | Length (aa) | Gene  | Function                                                                                      | Organism                                         | Hit ACC        | E-Value | Similarity | Alignment length |
|-------------|------|--------|------------------|-------------|-------|-----------------------------------------------------------------------------------------------|--------------------------------------------------|----------------|---------|------------|------------------|
| PSF113_3441 | CDS  | +      | 4051691..4052710 | 339         | pnpC2 | FIG00454641: hypothetical protein                                                             | Burkholderia sp. CCGE1002                        | YP_003609571.1 | 0       | 271        | 339              |
| PSF113_3442 | CDS  | +      | 4052805..4054268 | 487         | pnpD  | Aldehyde dehydrogenase(EC 1.2.1.3)                                                            | Burkholderia ambifaria AMMD                      | YP_777096.1    | 0       | 394        | 488              |
| PSF113_3443 | CDS  | +      | 4054277..4055344 | 355         | pnpF  | Alcohol dehydrogenase (EC 1.1.1.1)                                                            | Pseudomonas sp. WBC-3                            | ABU50914.1     | 0       | 327        | 355              |
| PSF113_3444 | CDS  | +      | 4055420..4056292 | 290         | dio1  | Dio1                                                                                          | Pseudomonas sp. WBC-3                            | ABU50913.1     | 0       | 247        | 290              |
| PSF113_3445 | CDS  | +      | 4056296..4056607 | 103         | yciL  | YciL                                                                                          | Pseudomonas sp. GM78                             | ZP_10624268.1  | 1E-60   | 90         | 103              |
| PSF113_3446 | CDS  | +      | 4056609..4056956 | 115         | pnpX2 | PnpX2                                                                                         | Pseudomonas sp. GM78                             | ZP_10624269.1  | 2E-63   | 91         | 111              |
| PSF113_3450 | CDS  | -      | 4060077..4060928 | 283         | hpcE  | HpcE                                                                                          | Bradyrhizobium sp. WSM471                        | ZP_09649218.1  | 5E-95   | 150        | 281              |
| PSF113_3451 | CDS  | +      | 4061690..4062052 | 120         |       | 4-hydroxyphenylacetate 3-monooxygenase reductase component                                    | Granulibacter bethesdensis CGDNIH1               | YP_744202.1    | 1E-33   | 58         | 112              |
| PSF113_3452 | CDS  | -      | 4062156..4062659 | 167         |       | carboxymuconolactone decarboxylase                                                            | Alicyclophilus denitrificans BC                  | YP_004128766.1 | 2E-65   | 107        | 165              |
| PSF113_3456 | CDS  | +      | 4066299..4067786 | 495         |       | 3-(3-hydroxy-phenyl)propionate hydroxylase                                                    | Agrobacterium vitis S4                           | YP_002539780.1 | 0       | 314        | 488              |
| PSF113_3457 | CDS  | +      | 4067890..4068525 | 211         |       | arylmalonate decarboxylase                                                                    | Novosphingobium sp. Rr 2-17                      | ZP_10362077.1  | 2E-70   | 114        | 207              |
| PSF113_3459 | CDS  | +      | 4070563..4070994 | 143         |       | putative exported protein                                                                     | Agrobacterium vitis S4                           | YP_002539772.1 | 2E-44   | 75         | 139              |
| PSF113_3460 | CDS  | -      | 4071116..4071901 | 261         |       | mhp operon transcriptional activator                                                          | Agrobacterium vitis S4                           | YP_002539763.1 | 3E-66   | 107        | 253              |
| PSF113_3463 | CDS  | +      | 4074715..4075464 | 249         |       | carboxymuconolactone decarboxylase                                                            | Agrobacterium vitis S4                           | YP_002539775.1 | 1E-71   | 114        | 213              |
| PSF113_3466 | CDS  | +      | 4077150..4077575 | 141         |       | carboxymuconolactone decarboxylase                                                            | Agrobacterium vitis S4                           | YP_002539778.1 | 1E-55   | 88         | 137              |
| PSF113_3467 | CDS  | +      | 4077610..4078158 | 182         |       | Biphenyl-2,3-diol 1,2-dioxygenase                                                             | Novosphingobium sp. Rr 2-17                      | ZP_10362079.1  | 6E-56   | 86         | 171              |
| PSF113_3469 | CDS  | +      | 4079513..4079845 | 110         |       | nucleic-acid-binding protein containing a zn-ribbon                                           | Novosphingobium sp. Rr 2-17                      | ZP_10362075.1  | 1E-27   | 50         | 80               |
| PSF113_3476 | CDS  | -      | 4087478..4088362 | 294         | ligR  | Transcriptional regulator ligR, LysR family                                                   | Pseudomonas putida W619                          | YP_001748333.1 | 2E-141  | 201        | 288              |
| PSF113_3477 | CDS  | -      | 4088390..4089316 | 308         |       | 3-hydroxyisobutyrate dehydrogenase-related beta-hydroxyacid dehydrogenase                     | Pseudomonas sp. M47T1                            | ZP_10149287.1  | 1E-113  | 192        | 282              |
| PSF113_3479 | CDS  | -      | 4090410..4091126 | 238         |       | Putative siderophore biosynthesis protein, related to 2-demethylmenaquinone methyltransferase | Serratia proteamaculans 568                      | YP_001478322.1 | 5E-127  | 177        | 235              |
| PSF113_3480 | CDS  | -      | 4091123..4091857 | 244         |       | FIG00959802: hypothetical protein                                                             | Pseudomonas syringae pv. aesculi str. NCPPB 3681 | ZP_06460101.1  | 8E-168  | 223        | 244              |
| PSF113_3481 | CDS  | +      | 4092011..4093234 | 407         |       | Transcriptional regulator, LysR family                                                        | Pseudomonas sp. GM78                             | ZP_10623222.1  | 0       | 270        | 403              |
| PSF113_3483 | CDS  | +      | 4094091..4095257 | 388         |       | Lysophospholipase (EC 3.1.1.5)                                                                | Desulfurispirillum indicum S5                    | YP_004113620.1 | 3E-171  | 233        | 379              |
| PSF113_3497 | CDS  | -      | 4109894..4111024 | 376         |       | Multidrug resistance efflux pump                                                              | Agrobacterium sp. H13-3                          | YP_004280648.1 | 6E-143  | 216        | 363              |
| PSF113_3498 | CDS  | -      | 4111098..4111544 | 148         |       | putative membrane protein                                                                     | Pseudomonas sp. GM18                             | ZP_10704146.1  | 2E-69   | 106        | 144              |
| PSF113_3563 | CDS  | +      | 4185660..4186736 | 358         | cheB3 | Chemotaxis response regulator protein-glutamate methyltransferase CheB (EC 3.1.1.61)          | Pseudomonas extremaustralis 14-3 substr. 14-3b   | ZP_10435492.1  | 0       | 287        | 354              |
| PSF113_3573 | CDS  | -      | 4200744..4201667 | 307         |       | Transcriptional regulator, LysR family                                                        | Pseudomonas sp. GM79                             | ZP_10614327.1  | 1E-145  | 206        | 300              |
| PSF113_3574 | CDS  | -      | 4201701..4202675 | 324         |       | Quinone oxidoreductase(EC 1.6.5.5)                                                            | Pseudomonas syringae pv. aceris str. M302273     | ZP_16733109.1  | 3E-172  | 244        | 324              |
| PSF113_3582 | CDS  | +      | 4212409..4213761 | 450         |       | 2-methylcitrate dehydratase                                                                   | Alcanivorax dieselolei B5                        | YP_006821692.1 | 0       | 304        | 434              |
| PSF113_3583 | CDS  | -      | 4213812..4215017 | 401         | xis   | Xis                                                                                           | Alcanivorax dieselolei B5                        | YP_006821700.1 | 1E-158  | 232        | 389              |
| PSF113_3584 | CDS  | +      | 4215219..4216565 | 448         |       | Citrate transporter                                                                           | Pseudomonas mendocina NK-01                      | YP_004380609.1 | 0       | 264        | 423              |
| PSF113_3586 | CDS  | +      | 4218078..4219106 | 342         |       | D-3-phosphoglycerate dehydrogenase (EC 1.1.1.95)                                              | Pseudomonas sp. Ag1                              | ZP_10477217.1  | 5E-139  | 211        | 332              |
| PSF113_3587 | CDS  | +      | 4219103..4220470 | 455         |       | 3-methylaspartate ammonia-lyase, glutamate mutase                                             | Pseudomonas sp. Ag1                              | ZP_10477218.1  | 0       | 320        | 452              |
| PSF113_3588 | CDS  | +      | 4220472..4220798 | 108         |       | hypothetical protein                                                                          | Pseudomonas sp. Ag1                              | ZP_10477219.1  | 2E-36   | 56         | 100              |
| PSF113_3590 | CDS  | +      | 4221775..4223043 | 422         |       | secretory lipase                                                                              | Alcanivorax dieselolei B5                        | YP_006821703.1 | 1E-180  | 274        | 403              |
| PSF113_3656 | CDS  | -      | 4302243..4303679 | 478         |       | drug resistance mfs transporter                                                               | Burkholderia multivorans ATCC BAA-247            | ZP_15919178.1  | 4E-159  | 264        | 437              |
| PSF113_3660 | CDS  | +      | 4315325..4316173 | 282         | lkcD  | LkcD                                                                                          | Hahella chejuensis KCTC 2396                     | YP_434659.1    | 1E-97   | 149        | 283              |
| PSF113_3663 | CDS  | +      | 4318277..4325512 | 2411        | lkcF  | Malonyl CoA-acyl carrier protein transacylase (EC 2.3.1.39)                                   | Hahella chejuensis KCTC 2396                     | YP_434656.1    | 2E-50   | 182        | 571              |
| PSF113_3666 | CDS  | +      | 4329095..4330678 | 527         | lkcJ  | LkcJ                                                                                          | Pseudomonas sp. Ag1                              | ZP_10474276.1  | 0       | 433        | 525              |

| F113 Locus  | Type | Strand | Coordinates      | Length (aa) | Gene | Function                                                           | Organism                                                | Hit ACC        | E-Value | Similarity | Alignment length |
|-------------|------|--------|------------------|-------------|------|--------------------------------------------------------------------|---------------------------------------------------------|----------------|---------|------------|------------------|
| PSF113_4073 | CDS  | -      | 4801978..4802601 | 207         |      | putative lipoprotein                                               | Pseudomonas protegens Pf-5                              | YP_260543.1    | 1E-51   | 96         | 179              |
| PSF113_4191 | CDS  | -      | 4918510..4918704 | 64          |      | hypothetical protein                                               | Pseudomonas sp. GM79                                    | ZP_10614059.1  | 1E-32   | 58         | 64               |
| PSF113_4279 | CDS  | +      | 5007641..5008678 | 345         |      | DNA-cytosine methyltransferase (EC 2.1.1.37)                       | Pseudomonas syringae pv. tomato Max13                   | ZP_07234026.1  | 0       | 287        | 344              |
| PSF113_4283 | CDS  | +      | 5013638..5014042 | 134         |      | Gifsy-2 prophage protein                                           | Pseudomonas fluorescens Bbc6R8                          | ZP_15597875.1  | 2E-43   | 71         | 97               |
| PSF113_4290 | CDS  | -      | 5018559..5021138 | 859         |      | Methyl-accepting chemotaxis protein                                | Pseudomonas sp. GM41(2012)                              | ZP_10670376.1  | 0       | 351        | 534              |
| PSF113_4291 | CDS  | -      | 5021154..5021276 | 40          |      | hypothetical protein                                               | Pseudomonas syringae pv. syringae FF5                   | ZP_06500139.1  | 1E-08   | 23         | 40               |
| PSF113_4292 | CDS  | -      | 5021239..5021565 | 108         |      | hypothetical protein                                               | Pseudomonas entomophila L48                             | YP_609626.1    | 1E-38   | 62         | 94               |
| PSF113_4299 | CDS  | -      | 5027777..5027926 | 49          |      | hypothetical protein                                               | Pseudomonas fluorescens WH6                             | ZP_07773798.1  | 4E-18   | 34         | 49               |
| PSF113_4300 | CDS  | -      | 5028086..5028649 | 187         |      | Baseplate assembly protein V                                       | Pseudomonas syringae pv. tomato K40                     | ZP_07255094.1  | 1E-108  | 152        | 187              |
| PSF113_4301 | CDS  | -      | 5028646..5029170 | 174         |      | hypothetical protein                                               | Pseudomonas syringae pv. lachrymans str. M302278        | ZP_16721365.1  | 6E-74   | 123        | 170              |
| PSF113_4302 | CDS  | -      | 5029163..5029825 | 220         |      | FIG00959540: hypothetical protein                                  | Pseudomonas sp. GM17                                    | ZP_10710365.1  | 3E-119  | 165        | 215              |
| PSF113_4303 | CDS  | -      | 5029822..5030136 | 104         |      | hypothetical protein                                               | Pseudomonas putida GB-1                                 | YP_001667445.1 | 6E-49   | 82         | 104              |
| PSF113_4304 | CDS  | -      | 5030139..5031134 | 331         |      | elements of external origin; phage-related functions and prophages | Pseudomonas mandelii JR-1                               | ZP_11109272.1  | 0       | 292        | 331              |
| PSF113_4305 | CDS  | -      | 5031478..5031822 | 114         |      | hypothetical protein                                               | Pseudomonas mandelii JR-1                               | ZP_11112469.1  | 2E-64   | 99         | 114              |
| PSF113_4306 | CDS  | -      | 5031819..5032979 | 386         |      | Prophage Clp protease-like protein                                 | Pseudomonas sp. GM74                                    | ZP_10626716.1  | 0       | 324        | 383              |
| PSF113_4307 | CDS  | -      | 5032976..5034457 | 493         |      | FIG00963359: hypothetical protein                                  | Pseudomonas syringae pv. actinidiae str. M302091        | ZP_16713621.1  | 0       | 386        | 493              |
| PSF113_4308 | CDS  | -      | 5034457..5034663 | 68          |      | hypothetical protein                                               | Pseudomonas sp. GM41(2012)                              | ZP_10670358.1  | 7E-39   | 63         | 68               |
| PSF113_4309 | CDS  | -      | 5034665..5036677 | 670         |      | Phage terminase, large subunit                                     | Pseudomonas fulva 12-X                                  | YP_004473518.1 | 0       | 430        | 606              |
| PSF113_4310 | CDS  | -      | 5036682..5037284 | 200         |      | terminase small subunit                                            | Pseudomonas sp. GM41(2012)                              | ZP_10670356.1  | 2E-123  | 174        | 200              |
| PSF113_4312 | CDS  | -      | 5038288..5038647 | 119         |      | hypothetical protein                                               | Pseudomonas fluorescens WH6                             | ZP_07773787.1  | 2E-66   | 100        | 119              |
| PSF113_4313 | CDS  | -      | 5038640..5040859 | 739         |      | DNA primase, phage associated                                      | Pseudomonas sp. GM80                                    | ZP_10611520.1  | 0       | 623        | 739              |
| PSF113_4314 | CDS  | -      | 5040849..5041076 | 75          |      | C4-type zinc finger protein, DksA/TraR family                      | Pseudomonas syringae pv. lachrymans str. M302278        | ZP_16721378.1  | 6E-33   | 58         | 75               |
| PSF113_4315 | CDS  | -      | 5041069..5041587 | 172         |      | FIG00958730: hypothetical protein                                  | Pseudomonas syringae pv. lachrymans str. M302278        | ZP_16721379.1  | 6E-109  | 153        | 172              |
| PSF113_4319 | CDS  | +      | 5044275..5044859 | 194         |      | hypothetical protein                                               | Pseudomonas fluorescens Bbc6R8                          | ZP_15597836.1  | 5E-93   | 136        | 185              |
| PSF113_4320 | CDS  | +      | 5044870..5045154 | 94          |      | DNA-binding protein Roi-related protein                            | Pseudomonas protegens Pf-5                              | YP_259102.1    | 8E-54   | 83         | 94               |
| PSF113_4321 | CDS  | +      | 5045313..5045642 | 109         |      | transcriptional regulator                                          | Pseudomonas protegens Pf-5                              | YP_259101.1    | 1E-60   | 92         | 108              |
| PSF113_4322 | CDS  | +      | 5045686..5046102 | 138         |      | hypothetical protein                                               | Pseudomonas sp. GM74                                    | ZP_10626698.1  | 2E-44   | 77         | 130              |
| PSF113_4323 | CDS  | +      | 5046099..5046320 | 73          |      | hypothetical protein                                               | Pseudomonas fluorescens WH6                             | ZP_07773778.1  | 7E-27   | 51         | 73               |
| PSF113_4324 | CDS  | +      | 5046317..5046859 | 180         |      | metal dependent phosphohydrolase                                   | Pseudomonas sp. GM41(2012)                              | ZP_10670343.1  | 1E-104  | 148        | 180              |
| PSF113_4325 | CDS  | +      | 5047281..5048489 | 402         |      | phage integrase                                                    | Pseudomonas extremaustralis 14-3 substr. 14-3b          | ZP_10438956.1  | 0       | 267        | 336              |
| PSF113_4501 | CDS  | -      | 5257976..5259292 | 438         |      | hipa-like c-terminal domain protein                                | Pseudomonas putida LS46                                 | ZP_15971311.1  | 0       | 277        | 438              |
| PSF113_4845 | CDS  | +      | 5633910..5634398 | 162         |      | RNA polymerase sigma-70 factor, ECF subfamily                      | Pseudomonas sp. GM60                                    | ZP_10637073.1  | 4E-96   | 138        | 162              |
| PSF113_4846 | CDS  | +      | 5634407..5635354 | 315         |      | Iron siderophore sensor protein                                    | Pseudomonas sp. GM78                                    | ZP_10618249.1  | 5E-153  | 215        | 312              |
| PSF113_4889 | CDS  | +      | 5680747..5680911 | 54          |      | hypothetical protein                                               | Pseudomonas brassicacearum subsp. brassicacearum NFM421 | YP_004356144.1 | 1E-29   | 50         | 54               |
| PSF113_4945 | CDS  | +      | 5740706..5740900 | 64          |      | hypothetical protein                                               | Pseudomonas sp. R81                                     | ZP_11190749.1  | 3E-27   | 50         | 64               |
| PSF113_4946 | CDS  | +      | 5741299..5742384 | 361         |      | filamentation induced by cAMP protein fic                          | Pseudomonas syringae pv. avellanae str. ISPaVe037       | ZP_17811982.1  | 0       | 334        | 361              |



| F113 Locus  | Type | Strand | Coordinates      | Length (aa) | Gene  | Function                                                                              | Organism                                                   | Hit ACC        | E-Value | Similarity | Alignment length |
|-------------|------|--------|------------------|-------------|-------|---------------------------------------------------------------------------------------|------------------------------------------------------------|----------------|---------|------------|------------------|
| PSF113_5105 | CDS  | -      | 5915647..5916246 | 199         |       | Transcriptional regulator, GntR family                                                | <i>Pseudomonas syringae</i> pv. morsprunorum str. M302280  | ZP_16662817.1  | 1E-123  | 172        | 199              |
| PSF113_5106 | CDS  | +      | 5916647..5917816 | 389         |       | Mn2+/Fe2+ transporter, NRAMP family                                                   | <i>Pseudomonas syringae</i> pv. oryzae str. 1_6            | ZP_04586656.1  | 0       | 306        | 389              |
| PSF113_5184 | CDS  | +      | 6003200..6005176 | 658         |       | Type I restriction-modification system, DNA-methyltransferase subunit M (EC 2.1.1.72) | <i>Pseudomonas</i> sp. GM17                                | ZP_10707280.1  | 0       | 594        | 661              |
| PSF113_5185 | CDS  | +      | 6005173..6006546 | 457         |       | Type I restriction-modification system, specificity subunit S (EC 3.1.21.3)           | <i>Pseudomonas aeruginosa</i> ATCC 14886                   | ZP_15611258.1  | 2E-143  | 234        | 439              |
| PSF113_5186 | CDS  | +      | 6006546..6009743 | 1065        |       | Type I restriction-modification system, restriction subunit R (EC 3.1.21.3)           | <i>Pseudomonas stutzeri</i> DSM 4166                       | YP_005937550.1 | 0       | 927        | 1056             |
| PSF113_5187 | CDS  | -      | 6009929..6010915 | 328         |       | FIG00958850: hypothetical protein                                                     | <i>Pseudomonas fluorescens</i> BBc6R8                      | ZP_15603748.1  | 0       | 279        | 321              |
| PSF113_5191 | CDS  | -      | 6013571..6016819 | 1082        |       | COG0553: Superfamily II DNA/RNA helicases, SNF2 family                                | <i>Pseudomonas extremaustralis</i> 14-3 substr. 14-3b      | ZP_10435057.1  | 0       | 1011       | 1082             |
| PSF113_5192 | CDS  | -      | 6016819..6018447 | 542         |       | putative; ORF located using Glimmer/Genemark                                          | <i>Pectobacterium carotovorum</i> subsp. carotovorum PCC21 | YP_006647908.1 | 5E-152  | 229        | 529              |
| PSF113_5193 | CDS  | -      | 6018444..6019187 | 247         |       | COG2885: Outer membrane protein and related peptidoglycan-associated (lipo)proteins   | <i>Pseudomonas extremaustralis</i> 14-3 substr. 14-3b      | ZP_10435055.1  | 5E-177  | 238        | 247              |
| PSF113_5194 | CDS  | -      | 6019201..6021027 | 608         |       | putative membrane protein                                                             | <i>Hafnia alvei</i> ATCC 51873                             | ZP_09376790.1  | 0       | 379        | 721              |
| PSF113_5316 | CDS  | +      | 6149144..6149848 | 234         |       | hypothetical protein                                                                  | <i>Pseudomonas aeruginosa</i> PAO1                         | NP_254115.1    | 17      | 40         | 125              |
| PSF113_5379 | CDS  | -      | 6220451..6220741 | 96          |       | Cro-like protein                                                                      | <i>Pseudomonas fluorescens</i>                             | ACT32384.1     | 5E-63   | 96         | 96               |
| PSF113_5380 | CDS  | -      | 6220758..6220916 | 52          |       | hypothetical protein                                                                  | <i>Pseudomonas fluorescens</i>                             | ACT32385.1     | 3E-29   | 51         | 52               |
| PSF113_5636 | CDS  | -      | 6504147..6505682 | 511         |       | multidrug resistance efflux protein                                                   | <i>Bacillus cereus</i> BAG1X1-2                            | ZP_17364789.1  | 3E-163  | 261        | 500              |
| PSF113_5637 | CDS  | -      | 6505682..6505957 | 91          |       | hypothetical protein                                                                  | <i>Photorhabdus asymbiotica</i>                            | YP_003040022.1 | 3E-10   | 29         | 84               |
| PSF113_5638 | CDS  | -      | 6506559..6508595 | 678         |       | 4-amino-4-deoxychorismate synthase, amidotransferase component, aminase component     | <i>Rhodococcus erythropolis</i> SK121                      | ZP_04383376.1  | 7E-176  | 302        | 673              |
| PSF113_5640 | CDS  | -      | 6510201..6510953 | 250         | prmC  | PrmC                                                                                  | <i>Bacillus cereus</i> BAG1X1-2                            | ZP_17364784.1  | 2E-75   | 110        | 235              |
| PSF113_5641 | CDS  | -      | 6511046..6512476 | 476         | forZ  | N-formimidoyl fortimicin A synthase                                                   | <i>Pseudomonas fluorescens</i> SBW25                       | YP_002871412.1 | 0       | 293        | 431              |
| PSF113_5672 | CDS  | -      | 6543144..6543617 | 157         |       | TonB-like protein                                                                     | <i>Pseudomonas</i> sp. GM78                                | ZP_10618829.1  | 6E-46   | 80         | 158              |
| PSF113_5730 | CDS  | +      | 6602672..6603031 | 119         |       | Mobile element protein                                                                | <i>Pseudomonas syringae</i> pv. tomato str. DC3000         | NP_793006.1    | 3E-79   | 117        | 119              |
| PSF113_5813 | CDS  | +      | 6705413..6705991 | 192         | tnpR  | TnpR                                                                                  | <i>Pseudomonas putida</i>                                  | CAB54047.1     | 4E-84   | 118        | 146              |
| PSF113_5903 | CDS  | -      | 6824047..6825018 | 323         | tctC2 | Tricarboxylate transport protein TctC                                                 | <i>Pseudomonas</i> sp. S9                                  | ZP_09711490.1  | 0       | 246        | 327              |
