# Supplementary material for: Genome sequence reveals that Pseudomonas fluorescens F113 possesses a large and diverse array of systems for rhizosphere function and host interaction
Source: PubMed Central journal article supplement (PMC3570484; doi:10.1186/1471-2164-14-54), 2013-01-25
Supplement: 1471-2164-14-54-S4.pdf [file 1471-2164-14-54-S4.pdf]

| SubGroup                          | Organism                                    | nar                         | nir | nor1 | nor2 | nos1 | nos2 |   |
|-----------------------------------|---------------------------------------------|-----------------------------|-----|------|------|------|------|---|
| I                                 | <i>P. fluorescens</i> F113                  | ■                           | ■   | ■    | ■    | ■    | ■    |   |
|                                   | <i>P. fluorescens</i> Wood1R                | ■                           | ■   | ■    | ■    | ■    | ■    |   |
|                                   | <i>P. brassicacearum</i> NFM421             | ■                           | ■   | ■    | ■    | ■    | ■    |   |
|                                   | <i>P. brassicacearum</i> Q8r1-96            | ■                           | ■   | ■    | ■    | ■    | ■    |   |
|                                   | <i>P. fluorescens</i> Q2-87                 | ■                           | ■   | ■    | ■    | ■    | ■    |   |
| <i>P. fluorescens</i> Pf0-1       | ■                                           | ■                           | ■   | ■    | ■    | ■    |      |   |
| <i>Pseudomonas</i> sp GM25        | ■                                           | ■                           | ■   | ■    | ■    | ■    |      |   |
| <i>P. fluorescens</i> R124        | ■                                           | ■                           | ■   | ■    | ■    | ■    |      |   |
| <i>Pseudomonas</i> sp GM30        | ■                                           | ■                           | ■   | ■    | ■    | ■    |      |   |
| II                                | <i>Pseudomonas</i> sp GM80                  | ■                           | ■   | ■    | ■    | ■    | ■    |   |
|                                   | <i>P. fluorescens</i> NZ011                 | ■                           | ■   | ■    | ■    | ■    | ■    |   |
|                                   | <i>Pseudomonas</i> sp GM16                  | ■                           | ■   | ■    | ■    | ■    | ■    |   |
|                                   | <i>Pseudomonas</i> sp GM24                  | ■                           | ■   | ■    | ■    | ■    | ■    |   |
|                                   | <i>Pseudomonas</i> sp R62                   | ■                           | ■   | ■    | ■    | ■    | ■    |   |
|                                   | <i>Pseudomonas</i> sp GM49                  | ■                           | ■   | ■    | ■    | ■    | ■    |   |
|                                   | <i>Pseudomonas</i> sp GM48                  | ■                           | ■   | ■    | ■    | ■    | ■    |   |
|                                   | <i>Pseudomonas</i> sp GM74                  | ■                           | ■   | ■    | ■    | ■    | ■    |   |
|                                   | <i>Pseudomonas</i> sp GM33                  | ■                           | ■   | ■    | ■    | ■    | ■    |   |
|                                   | <i>Pseudomonas</i> sp GM55                  | ■                           | ■   | ■    | ■    | ■    | ■    |   |
|                                   | <i>Pseudomonas</i> sp GM78                  | ■                           | ■   | ■    | ■    | ■    | ■    |   |
|                                   | <i>Pseudomonas</i> sp GM21                  | ■                           | ■   | ■    | ■    | ■    | ■    |   |
|                                   | III                                         | <i>Pseudomonas</i> sp GM50  | ■   | ■    | ■    | ■    | ■    | ■ |
|                                   |                                             | <i>Pseudomonas</i> sp GM102 | ■   | ■    | ■    | ■    | ■    | ■ |
| <i>Pseudomonas</i> sp GM79        |                                             | ■                           | ■   | ■    | ■    | ■    | ■    |   |
| <i>Pseudomonas</i> sp GM18        |                                             | ■                           | ■   | ■    | ■    | ■    | ■    |   |
| <i>Pseudomonas</i> sp GM41        |                                             | ■                           | ■   | ■    | ■    | ■    | ■    |   |
| <i>P. mandelii</i> JR-1           |                                             | ■                           | ■   | ■    | ■    | ■    | ■    |   |
| <i>P. fluorescens</i> NCIMB 11764 | ■                                           | ■                           | ■   | ■    | ■    | ■    |      |   |
| <i>Pseudomonas</i> sp GM67        | ■                                           | ■                           | ■   | ■    | ■    | ■    |      |   |
| <i>Pseudomonas</i> sp GM60        | ■                                           | ■                           | ■   | ■    | ■    | ■    |      |   |
| <i>P. protegens</i> Pf-5          | ■                                           | ■                           | ■   | ■    | ■    | ■    |      |   |
| <i>P. fluorescens</i> Wayne1      | ■                                           | ■                           | ■   | ■    | ■    | ■    |      |   |
| <i>P. fluorescens</i> NZ17        | ■                                           | ■                           | ■   | ■    | ■    | ■    |      |   |
| IV                                | <i>P. chlororaphis</i> 30-84                | ■                           | ■   | ■    | ■    | ■    | ■    |   |
|                                   | <i>Pseudomonas</i> sp GM17                  | ■                           | ■   | ■    | ■    | ■    | ■    |   |
|                                   | <i>P. chlororaphis</i> O6                   | ■                           | ■   | ■    | ■    | ■    | ■    |   |
|                                   | <i>P. chlororaphis</i> GP72                 | ■                           | ■   | ■    | ■    | ■    | ■    |   |
|                                   | <i>P. tolaasii</i> NCPPB 2192               | ■                           | ■   | ■    | ■    | ■    | ■    |   |
|                                   | <i>P. tolaasii</i> PMS117                   | ■                           | ■   | ■    | ■    | ■    | ■    |   |
|                                   | <i>Pseudomonas</i> sp Ag1                   | ■                           | ■   | ■    | ■    | ■    | ■    |   |
|                                   | <i>Pseudomonas</i> sp PAMC 25886            | ■                           | ■   | ■    | ■    | ■    | ■    |   |
|                                   | <i>P. extremaustralis</i> 14-3 substr 14-3b | ■                           | ■   | ■    | ■    | ■    | ■    |   |
|                                   | <i>P. fluorescens</i> A506                  | ■                           | ■   | ■    | ■    | ■    | ■    |   |
| V                                 | <i>P. fluorescens</i> SS101                 | ■                           | ■   | ■    | ■    | ■    | ■    |   |
|                                   | <i>Pseudomonas</i> sp BG33R                 | ■                           | ■   | ■    | ■    | ■    | ■    |   |
|                                   | <i>P. fluorescens</i> NZ007                 | ■                           | ■   | ■    | ■    | ■    | ■    |   |
|                                   | <i>P. fluorescens</i> WH6                   | ■                           | ■   | ■    | ■    | ■    | ■    |   |
|                                   | <i>P. fluorescens</i> SBW25                 | ■                           | ■   | ■    | ■    | ■    | ■    |   |
|                                   | <i>P. fluorescens</i> NZ052                 | ■                           | ■   | ■    | ■    | ■    | ■    |   |
|                                   | <i>Pseudomonas</i> sp R81                   | ■                           | ■   | ■    | ■    | ■    | ■    |   |
