# Supplementary material for: Genome sequence reveals that Pseudomonas fluorescens F113 possesses a large and diverse array of systems for rhizosphere function and host interaction
Source: PubMed Central journal article supplement (PMC3570484; doi:10.1186/1471-2164-14-54), 2013-01-25
Supplement: 1471-2164-14-54-S5.pdf [file 1471-2164-14-54-S5.pdf]

| SubGroup                    | Organism                                    | Wsp | Chp | Che1 | Che2 | Che3 |
|-----------------------------|---------------------------------------------|-----|-----|------|------|------|
| I                           | <i>P. fluorescens</i> F113                  |     |     |      |      |      |
|                             | <i>P. fluorescens</i> Wood1R                |     |     |      |      |      |
|                             | <i>P. brassicacearum</i> NFM421             |     |     |      |      |      |
|                             | <i>P. brassicacearum</i> Q8r1-96            |     |     |      |      |      |
|                             | <i>P. fluorescens</i> Q2-87                 |     |     |      |      |      |
| II                          | <i>P. fluorescens</i> Pf0-1                 |     |     |      |      |      |
|                             | <i>Pseudomonas</i> sp GM25                  |     |     |      |      |      |
|                             | <i>P. fluorescens</i> R124                  |     |     |      |      |      |
|                             | <i>Pseudomonas</i> sp GM30                  |     |     |      |      |      |
|                             | <i>Pseudomonas</i> sp GM80                  |     |     |      |      |      |
|                             | <i>P. fluorescens</i> NZ011                 |     |     |      |      |      |
|                             | <i>Pseudomonas</i> sp GM16                  |     |     |      |      |      |
|                             | <i>Pseudomonas</i> sp GM24                  |     |     |      |      |      |
|                             | <i>Pseudomonas</i> sp R62                   |     |     |      |      |      |
|                             | <i>Pseudomonas</i> sp GM49                  |     |     |      |      |      |
|                             | <i>Pseudomonas</i> sp GM48                  |     |     |      |      |      |
|                             | <i>Pseudomonas</i> sp GM74                  |     |     |      |      |      |
|                             | <i>Pseudomonas</i> sp GM33                  |     |     |      |      |      |
|                             | <i>Pseudomonas</i> sp GM55                  |     |     |      |      |      |
|                             | <i>Pseudomonas</i> sp GM78                  |     |     |      |      |      |
| III                         | <i>Pseudomonas</i> sp GM21                  |     |     |      |      |      |
|                             | <i>Pseudomonas</i> sp GM50                  |     |     |      |      |      |
|                             | <i>Pseudomonas</i> sp GM102                 |     |     |      |      |      |
|                             | <i>Pseudomonas</i> sp GM79                  |     |     |      |      |      |
|                             | <i>Pseudomonas</i> sp GM18                  |     |     |      |      |      |
|                             | <i>Pseudomonas</i> sp GM41                  |     |     |      |      |      |
|                             | <i>P. mandelii</i> JR-1                     |     |     |      |      |      |
|                             | <i>P. fluorescens</i> NCIMB 11764           |     |     |      |      |      |
|                             | <i>Pseudomonas</i> sp GM67                  |     |     |      |      |      |
|                             | <i>Pseudomonas</i> sp GM60                  |     |     |      |      |      |
| IV                          | <i>P. protegens</i> Pf-5                    |     |     |      |      |      |
|                             | <i>P. fluorescens</i> Wayne1                |     |     |      |      |      |
|                             | <i>P. fluorescens</i> NZ17                  |     |     |      |      |      |
|                             | <i>P. chlororaphis</i> 30-84                |     |     |      |      |      |
|                             | <i>Pseudomonas</i> sp GM17                  |     |     |      |      |      |
|                             | <i>P. chlororaphis</i> O6                   |     |     |      |      |      |
|                             | <i>P. chlororaphis</i> GP72                 |     |     |      |      |      |
|                             | <i>P. tolaasii</i> NCPPB 2192               |     |     |      |      |      |
|                             | <i>P. tolaasii</i> PMS117                   |     |     |      |      |      |
|                             | <i>Pseudomonas</i> sp Ag1                   |     |     |      |      |      |
| V                           | <i>Pseudomonas</i> sp PAMC 25886            |     |     |      |      |      |
|                             | <i>P. extremaustralis</i> 14-3 substr 14-3b |     |     |      |      |      |
|                             | <i>P. fluorescens</i> A506                  |     |     |      |      |      |
|                             | <i>P. fluorescens</i> SS101                 |     |     |      |      |      |
|                             | <i>Pseudomonas synxantha</i> BG33R          |     |     |      |      |      |
|                             | <i>P. fluorescens</i> NZ007                 |     |     |      |      |      |
|                             | <i>P. fluorescens</i> WH6                   |     |     |      |      |      |
|                             | <i>P. fluorescens</i> SBW25                 |     |     |      |      |      |
| <i>P. fluorescens</i> NZ052 |                                             |     |     |      |      |      |
| <i>Pseudomonas</i> sp R81   |                                             |     |     |      |      |      |
