# Supplementary material for: Genome sequence reveals that Pseudomonas fluorescens F113 possesses a large and diverse array of systems for rhizosphere function and host interaction
Source: PubMed Central journal article supplement (PMC3570484; doi:10.1186/1471-2164-14-54), 2013-01-25

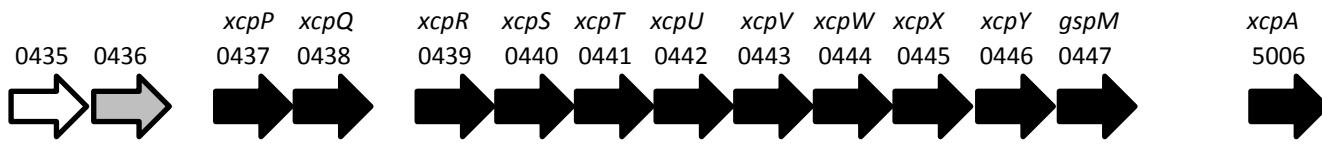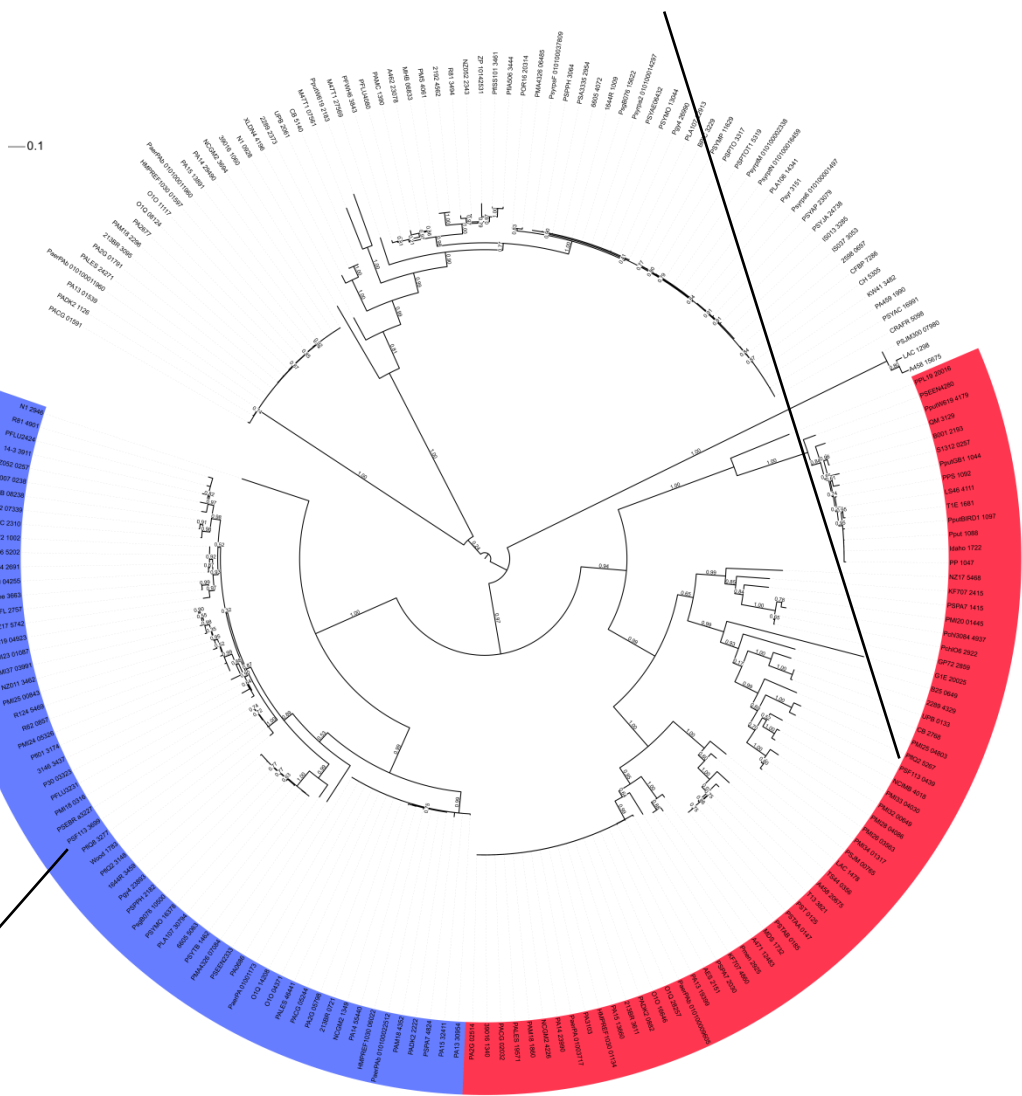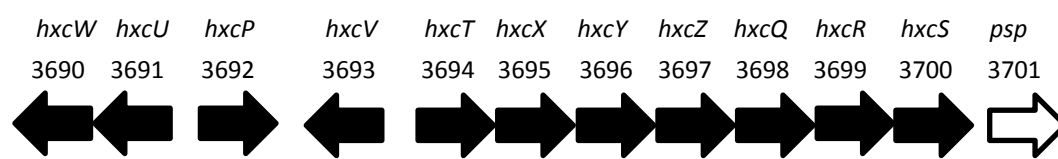

Supplement: 1471-2164-14-54-S7.pdf [file 1471-2164-14-54-S7.pdf]
