# Supplementary material for: Genome sequence reveals that Pseudomonas fluorescens F113 possesses a large and diverse array of systems for rhizosphere function and host interaction
Source: PubMed Central journal article supplement (PMC3570484; doi:10.1186/1471-2164-14-54), 2013-01-25
Supplement: 1471-2164-14-54-S8.pdf [file 1471-2164-14-54-S8.pdf]

*invF* *invG* *invE* *invA* *invC* *spaM* *spaN* *spaO* *spaP* *spaQ* *spaR* *spaS* *sicA* *sipB* *sipC* *sipD* *iacP* *hilA* *iagB* *prgH* *prgI* *prgJ* *prgK* *orgA* *orgB*  
 1778 1779 1780 1781 1782 1782.1 1783 1784 1785 1786 1787 1788 1789 1790 1791 1792 1793 1794 1795 1796 1797 1798 1799 1800 1801 1802

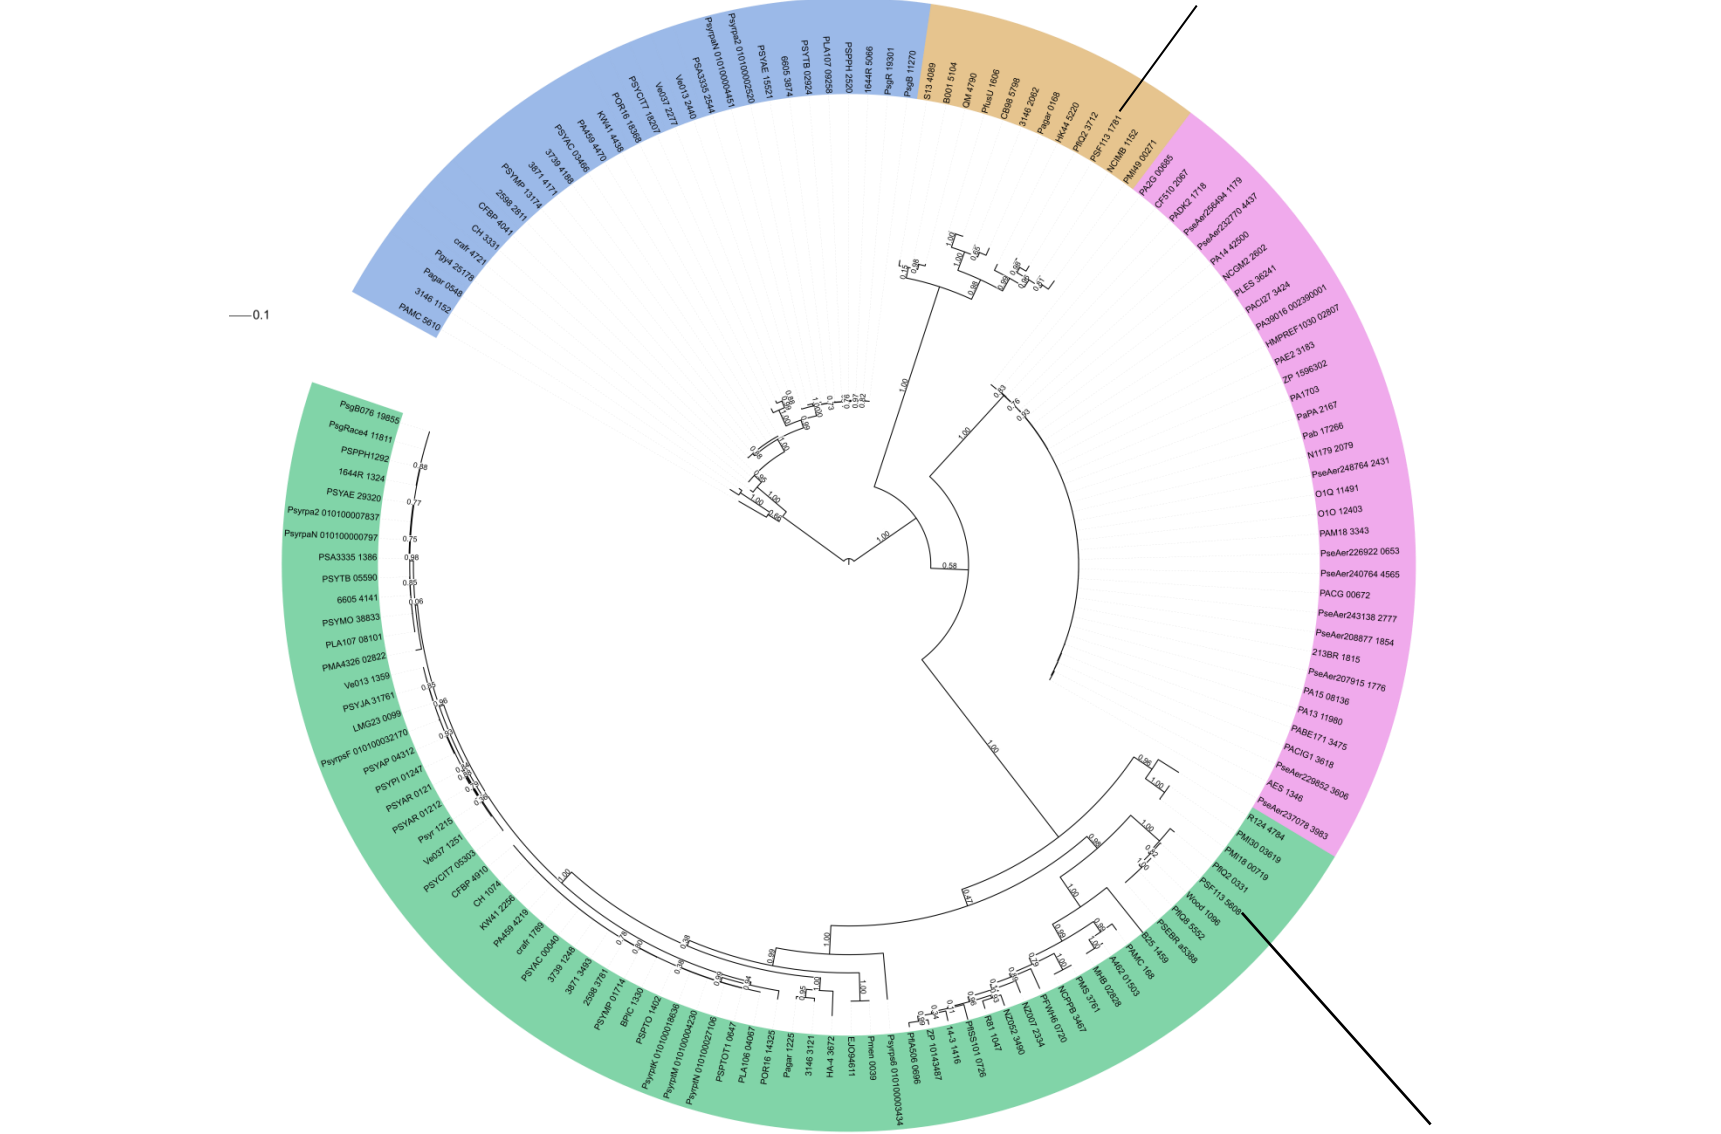

*rspS* *rspA* *rspZ* *rspB* *rscJ* *rspD* *rspE* *rspF* *rspG* *rspC* *rspT* *rspV* *srcB* *ropB* *rscU* *rscT* *rscS* *rscR* *rscQ* *rspP* *rspO* *rscN* *rspQ* *rscV* *rspJ* *rspL*  
 5585 5586 5587 5588 5589 5590 5591 5592 5593 5594 5595 5596 5597 5598 5599 5600 5601 5602 5603 5604 5605 5606 5607 5608 5609 5610 5611
